*Running head:* EVOLUTIONARY INTEGRATION WITH UNCERTAINTY

# Estimating correlated rates of trait evolution with uncertainty

CAETANO, D.S.<sup>1</sup> AND HARMON, L.J.<sup>1</sup>

<sup>1</sup>*Department of Biological Sciences, Institute for Bioinformatics and Evolutionary Studies (IBEST), University of Idaho, Moscow, Idaho, 83843, USA;*

**Corresponding author:** Daniel S. Caetano, E-mail: caetanods1@gmail.com.

*Abstract:* Correlated evolution among traits can happen due to genetic constraints, ontogeny, and selection and have an important impact on the trajectory of phenotypic evolution. Thus, shifts in the pattern of evolutionary integration may allow the exploration of novel regions of the morphospace by lineages. Here we use phylogenetic trees to study the pace of evolution of several traits and their pattern of evolutionary correlation across clades and over time. We use regimes mapped to the branches of the phylogeny to test for shifts in evolutionary integration. Our approach incorporates the uncertainty related to phylogeny, ancestral state estimates and parameter estimates to produce posterior distributions using Bayesian Markov chain Monte Carlo. We implemented the use of summary statistics to test for regime shifts based on a series of attributes of the model that can be directly relevant to biological hypotheses. In addition, we extend Felsenstein's pruning algorithm to the case of multivariate Brownian motion models with multiple rate regimes. We performed extensive simulations to explore the performance of the method under a series of scenarios. Finally, we provide two test cases; the evolution of a novel buccal morphology in fishes of the family Centrarchidae and a shift in the trajectory of evolution of traits during the radiation of anole lizards to the Caribbean islands.

*Keywords:* *Anolis*, Centrarchidae, comparative methods, evolutionary integration, evolutionary rates, modularity, pruning algorithm

Correlated evolution among traits, known as evolutionary integration, is ubiquitous across the tree of life and can have an important impact on the trajectory of phenotypic evolution (Olson and Miller, 1958; Klingenberg and Marugán-Lobón, 2013; Armbruster et al., 2014; Klingenberg, 2014; Goswami et al., 2014, 2015; Melo et al., 2016). Genetic constraints, ontogeny, and selection have pivotal roles in the development and maintenance of morphological integration over time (Arnold, 1992; Arnold et al., 2001; Hansen and Houle, 2004; Goswami et al., 2015; Melo et al., 2016). When the additive genetic covariance between traits is strong, then evolutionary correlation is likely due to genetic factors. In contrast, traits might not show strong genetic covariance and still be evolutionarily integrated due to correlated selection, which can be a result of distinct factors, such as anatomical interactions during growth or coordinated function (Armbruster and Schwaegerle, 1996; Armbruster et al., 2014). For instance, correlated evolution can be favored by selection to maintain a cohesive pattern of variation among traits with a shared function, but evolution can be hindered if the genetic covariance is not aligned with the selection gradient (Lande, 1979; Schluter, 1996; Villmoare, 2012; Goswami et al., 2014). Alternatively, when evolutionary correlation is mainly a result of correlated selection then the morphospace occupied by lineages can be restricted by the strength and direction of the selection gradient (Felsenstein, 1988; Armbruster and Schwaegerle, 1996). Shifts in the pattern of evolutionary integration among traits over macroevolutionary scales, due to changes in the genetic architecture or selection gradient, may play a fundamental role in the exploration of novel regions of the morphospace (Young and Hallgrímsson, 2005; Goswami, 2006; Revell and Collar, 2009; Monteiro and Nogueira, 2010; Hallgrímsson et al., 2012; Claverie and Patek, 2013).

Macroevolutionary transitions in morphospace evolution have been associated with both increases and decreases in the evolutionary integration among traits. In centrarchid fishes, for example, the evolution of a novel mouth morphology was followed by a rapid differentiation of feeding habits. More specifically, the increase in the evolutionary correlation between two morphological features of the suction-feeding mechanism in species of *Micropterus* is associated with a specialization towards consumption of larger prey (Collar et al., 2005; Revell and Collar, 2009). In contrast, the once strong developmental integration between the fore- and hindlimbs of early tetrapods underwent a dramatic change allowing the limbs to respond to

diverging selective pressures and leading to the evolution of bipedalism and flight (Young and Hallgrímsson, 2005; Young et al., 2010; Dececchi and Larsson, 2013). These examples show the role of shifts in evolutionary integration associated with the evolution of novel morphologies. However, stable patterns of evolutionary integration over long time scales can be responsible for the constraint of lineages to limited regions of the morphospace and might be a plausible mechanism associated with patterns of stasis observed in the fossil record (Hansen and Houle, 2004; Bolstad et al., 2014; Goswami et al., 2015). Thus, evolutionary trait correlations are central to the maintenance of form and function through time, but can either drive or slow morphological differentiation.

Despite the prevalent role of evolutionary integration, most of what we know about the tempo and mode of trait evolution come from studies of single traits (e.g., Harmon et al., 2010; Hunt et al., 2015, among others). Even when multiple traits are the object of investigation, studies often use principal component axes (or phylogenetic PCA; Revell, 2009) to reduce the dimensionality of the data so that univariate methods can be applied (Harmon et al., 2010; Mahler et al., 2013; Klingenberg and Marugán-Lobón, 2013, see Uyeda et al. 2015 for more examples). This is most likely a reflection of the phylogenetic comparative models of trait evolution available for use, since few are focused on two or more traits (but see Revell and Harmon, 2008; Hohenlohe and Arnold, 2008; Revell and Collar, 2009; Bartoszek et al., 2012; Adams, 2012, 2014b; Clavel et al., 2015). However, studying one trait at a time eliminates the possibility of identifying patterns of evolutionary correlation, while principal component axes does not allow testing for evolutionary shifts in integration because the orientation of the PC axes are homogeneous across the branches of the phylogenetic tree. Furthermore, it also has been shown that PCA can influence our biological interpretation about the mode of evolution of the data (Uyeda et al., 2015) because the first PC axes are consistently estimated as early bursts of differentiation whereas the last axes store a strong signal of stabilizing selection, independent of the true model of evolution of the traits. As a result, we need models that apply to multivariate data as such in order to better understand macroevolutionary patterns of evolutionary integration.

One way to model multivariate trait evolution using phylogenetic trees is through the evolutionary rate matrix (Hohenlohe and Arnold, 2008; Revell and Harmon, 2008; Revell and Collar,

2009; Adams and Felice, 2014). This is a variance-covariance matrix that describes the rates of trait evolution under Brownian motion in the diagonals and the evolutionary covariance among traits (i.e., the pattern of evolutionary integration) in the off-diagonals (Huelsenbeck and Rannala, 2003; Revell and Harmon, 2008). The evolutionary rate matrix is ideal for studying patterns of evolutionary integration because it allows for simultaneous estimate of the individual rates of evolution of each trait as well as the evolutionary covariance between each pair of traits. It is also a flexible model, since any number of evolutionary rate matrix regimes can be fitted to the same phylogenetic tree (Revell and Collar, 2009). The contrast between evolutionary rate matrices independently estimated in different regions of the tree can inform us about the magnitude and direction of shifts in the pattern of evolutionary integration.

One of the challenges of working with rate matrices is that covariances can be hard to estimate, especially when the number of species (observations) is small relative to the number of traits (parameters) in the model. As the number of parameters in a model increases, the amount of data required for proper estimation also increases and it becomes crucial to directly incorporate uncertainty in parameter estimates when interpreting results. However, the majority of studies to date have relied on point estimates of the evolutionary rate matrix by maximum likelihood (Revell and Harmon, 2008; Revell and Collar, 2009; Clavel et al., 2015; Goolsby, 2016, but see Huelsenbeck and Rannala, 2003 and Dines et al., 2014 for exceptions). Although the confidence interval around the maximum likelihood estimate can be used as a measure of uncertainty, this quantity is rarely reported (Revell and Harmon, 2008; Revell and Collar, 2009; Adams, 2012; Immler et al., 2012; Adams and Felice, 2014; Collar et al., 2014). Furthermore, the uncertainty in parameter estimates does not take direct part in model selection using likelihood ratio tests or AIC (Burnham and Anderson, 2003), which can lead researchers to erroneous conclusions about their models. Besides the possible uncertainty in parameter estimates, there is an important computational burden associated with the evaluation of the likelihood function of the multivariate Brownian motion model due to the computation of matrix inversions and determinants (Felsenstein, 1973; Hadfield and Nakagawa, 2010; Freckleton, 2012). Thus, computational time can become a limitation when performing a large number of likelihood evaluations, such as in simulation based approaches.

Recently, Adams (2014b) described a method to estimate the rate of evolution under Brow-

118 nian motion of traits defined by several dimensions (high-dimensional data), even when the  
 119 number of trait dimensions exceeds the number of lineages in the phylogeny. This method was  
 120 extended to a plethora of variations based on the same general framework (Adams and Felice,  
 121 2014; Adams, 2014a; Denton and Adams, 2015, see also Goolsby (2016) for a different imple-  
 122 mentation). These methods work with high-dimensional data as a result of the use of distance  
 123 matrices rather than covariance matrices, since the later becomes singular if the number of  
 124 variables is larger than the number of observations. However, by avoiding the calculation of  
 125 the covariance among trait dimensions (Adams, 2014b), such suite of methods assume a homo-  
 126 geneous rate of evolution shared by all dimensions of a trait (the  $\sigma_{mult}^2$ ). Thus,  $\sigma_{mult}^2$  is ideal for  
 127 high-dimensional traits such as shape data, but it has limitations for the study of evolutionary  
 128 integration among multiple traits.

129 In order to ask questions about the evolution of integration using phylogenetic trees we need  
 130 a computationally efficient method that can estimate evolutionary rate matrices while incorpo-  
 131 rating uncertainty in parameter estimates. Here we implement a Bayesian estimate for the evo-  
 132 lutionary rate matrix using Markov chain Monte Carlo (MCMC) to provide a direct assessment  
 133 of the uncertainty associated with parameter estimates in the form of a posterior distribution.  
 134 Our implementation also allows for multiple regime configurations and/or phylogenetic trees to  
 135 be incorporated in the MCMC chain, thus integrating the uncertainty associated with ancestral  
 136 state estimates and phylogenetic reconstruction to the analysis. In order to increase the per-  
 137 formance of the likelihood evaluation, we implemented Felsenstein's (1973) pruning algorithm.  
 138 We also derive a new version of the pruning algorithm that is suitable for the special case when  
 139 several rate regimes of the multivariate Brownian motion model are fit to different branches of  
 140 the same phylogenetic tree. We apply our new approach to two biological examples: the fast  
 141 evolution of morphology associated with the radiation of *Anolis* lizards from mainland South  
 142 America to the Caribbean islands (Pinto et al., 2008; Mahler et al., 2013; Moreno-Arias and  
 143 Calderón-Espinosa, 2016) and the shift of feeding habits driven by the change in mouth mor-  
 144 phology in Centrarchidae fishes (Revell and Collar, 2009). We show that there is no detectable  
 145 shift in the evolutionary integration among morphological traits during the anole radiation and  
 146 that there is significant uncertainty in estimates of evolutionary correlation associated with the  
 147 Centrarchidae mouth traits. We also provide results from extensive simulations showing that

our approach has good performance under diverse scenarios of correlated evolution.

## Methods

### *A new pruning algorithm for multivariate Brownian motion with multiple regimes*

To test for shifts in the pattern of evolutionary integration among traits we need to estimate the rates of evolution for the individual traits and their evolutionary covariation, i.e. by estimating the evolutionary rate matrix ( $\mathbf{R}$ ; Revell and Harmon, 2008). Revell and Collar (2009) derived a general form of the likelihood function for the model that allows for several independent matrices assigned to different branches of the phylogenetic tree.

$$L_p = \frac{\exp[-(\mathbf{y} - \mathbf{D}\mathbf{a}^T)^T (\sum_{k=1}^p \mathbf{R}_k \otimes \mathbf{C}_k)^{-1} \frac{(\mathbf{y} - \mathbf{D}\mathbf{a}^T)}{2}]}{\sqrt{(2\pi)^{nr} |\sum_{k=1}^p \mathbf{R}_k \otimes \mathbf{C}_k|}} \quad (1)$$

Where  $\mathbf{y}$  is a vector of length  $n \cdot r$  derived by concatenating the columns of a  $n$  by  $r$  matrix of trait values for  $n$  tips and  $r$  traits;  $\mathbf{D}$  is a  $n \cdot r$  by  $r$  design matrix composed of 1 for each  $(i, j)$  entry that satisfies  $(j - 1) \cdot n < i \leq j \cdot n$  and 0 otherwise;  $\mathbf{a}$  is a vector with  $r$  root values for the tree (or the phylogenetic mean);  $\mathbf{R}_k$  is the  $k$ th evolutionary rate matrix with size  $r$ . Each of the  $\mathbf{C}_k$  matrices has only the sum of branch lengths which were assigned to the respective evolutionary rate matrix. Thus,  $\sum_{k=1}^p \mathbf{C}_k$  is equal to the phylogenetic covariance matrix ( $\mathbf{C}$ ) for the whole tree. The elements of  $\mathbf{C}$  are composed by the sum of branch lengths shared by each pair of taxa (Felsenstein, 1973). Finally,  $p$  is the number of  $\mathbf{R}$  matrix regimes fitted to the tree. When  $p$  is equal to 1, equation (1) reduces to the likelihood function for a single  $\mathbf{R}$  matrix (Revell and Harmon, 2008).

The likelihood function for the evolutionary rate matrix as shown requires the matrix inversion and determinant to be computed for the sum of the Kronecker product between each  $\mathbf{R}_k$  and  $\mathbf{C}_k$  matrices. However, the matrices resulted from this product can be very large because each  $\mathbf{R}$  has dimension equal to the number of traits in the data whereas  $\mathbf{C}$  is as large as the number of tips in the phylogeny. Some methods can be used to speed up the computation in the case of multiple rate regimes applied to the tree. For instance, the ‘rpf’ method avoids the explicit

computation of the matrix inversion and determinant by applying Cholesky factors (Gustavson et al., 2010; Clavel et al., 2015) whereas Goolsby (2016) recently introduced the use of pairwise composite likelihoods, which consists of the product of the pairwise likelihoods computed for all combinations of traits. These methods reduce the computational time for the evaluation of the likelihood but are still more time consuming than the pruning algorithm (Felsenstein, 1973; Freckleton, 2012; Caetano and Harmon, 2017). Here, we expand the pruning algorithm applied to the multivariate Brownian motion model (Felsenstein, 1973; Freckleton, 2012) to compute the likelihood even when multiple evolutionary rate matrices are fitted to different branches of the phylogenetic tree. This algorithm is implemented in the R package `ratematrix` (Caetano and Harmon, 2017) and we provide a detailed description in the **Supplementary Material**.

## *MCMC prior densities and sampling strategy*

We have developed and implemented a Bayesian method to estimate one or more evolutionary rate matrices from phylogenetic comparative data. Our primary objective is to provide a framework to incorporate uncertainty in the estimates of  $\mathbf{R}$  as well as to build a flexible model to study shifts in evolutionary integration across clades and over time. Our method requires a phylogenetic tree with branch lengths, continuous data for two or more traits for each tip species, and it uses Metropolis-Hastings Markov chain Monte Carlo (MCMC, Metropolis et al., 1953; Hastings, 1970).

We model the prior density for the vector of root values ( $\mathbf{a}$ ) as an uniform or normal distribution and we use an uniform sliding window proposal density to sample the root value for every trait simultaneously. In contrast, the prior density and sampling scheme for the evolutionary rate matrix requires more elaboration because variance-covariance matrices are positive definite and are relatively hard to be estimated. We model  $\mathbf{R}$  with two independent distributions; one for the vector of standard deviations and another for the correlation matrix (Barnard et al., 2000; Zhang et al., 2006). This method allows the prior density for the rates (vector of standard deviations) to be parametrized independently of the evolutionary integration (correlation matrix). Under this parametrization, one can assign any distribution of positive real values to the vector of standard deviations (here we use an uniform or a exponential density) and the correlation matrix is modelled as the Cholesky decomposition of variance-covariance

matrices sampled from an inverse-Wishart distribution (Zhang et al., 2006). This parameter extension approach is named ‘separation-strategy’ (Barnard et al., 2000; Zhang et al., 2006) because it relies on the independent modelling of the vector of standard deviations and the correlation matrix that together compose the evolutionary rate matrix. The advantage of the separation-strategy is twofold; it allows for intuitive modelling of rates of evolution and evolutionary integration and it is an efficient proposal scheme, because matrices are guaranteed to be positive definite at every draw (Barnard et al., 2000; Zhang et al., 2006).

## *Incorporating uncertainty in regime configurations and phylogenetic trees*

Our approach can integrate any number of evolutionary rate matrix regimes fitted to the same phylogenetic tree. A regime is often dictated by some categorical data which states are hypothesized to be associated with shifts in the tempo and mode of evolution of the traits under study. Regimes are often ‘painted’ to the phylogenetic tree using stochastic mapping simulations (Huelsenbeck et al., 2003) and analyses are repeated over a sample of stochastic maps. In order to facilitate incorporation of uncertainty in both ancestral state estimates and phylogenetic inference, such as multiple phylogenetic trees sampled from a posterior distribution, we implemented a MCMC that integrates over multiple rate regime configurations and/or phylogenetic trees. At each step of the MCMC chain one phylogenetic tree is randomly sampled from a pre-determined pool of trees and used to evaluate the likelihood of the model. The approach assumes that each phylogeny or regime configuration in the pool has equal chance to be sampled, but one can also assign the frequency of sampling as a result of a previous analysis. This pool is assumed to be gathered *a priori*, as a result of stochastic mapping simulations, samples from a posterior distribution of trees or other similar analyses. Although this method does incorporate the uncertainty related to alternative regime configurations, different topologies and set of branch lengths, it is not a joint estimation of the tree and the model because the MCMC only applies proposal steps to the vector of root values and the evolutionary rate matrices.

## 227 *Testing for shifts between rate regimes*

228 A useful criterion to perform model selection in a Bayesian framework is the Bayes factor (Kass  
229 and Raftery, 1995), which is a ratio between the marginal likelihoods of the competing models.  
230 However, the estimation of marginal likelihoods is a computationally expensive and contentious  
231 task. One of the most accurate methods to estimate the marginal likelihood is the stepping  
232 stone approach. This method consists of taking samples from a series of weighted posterior  
233 distributions by scaling the likelihood of the model so that a continuum between the prior and  
234 the posterior is created (Fan et al., 2011; Xie et al., 2011; Uyeda and Harmon, 2014). However,  
235 the stepping stone method adds significantly to the computation burden of the analysis, because  
236 each step of the continuum represents a complete MCMC chain and a large number of steps are  
237 required to produce a sufficient approximation of the marginal likelihood (Uyeda and Harmon,  
238 2014).

239 Here, we do not use Bayes factor to compare models, although implementation is feasible for  
240 future work. We focus our interpretation of results on the distribution of posterior parameter  
241 estimates, and quantify the amount of uncertainty and the magnitude of the difference be-  
242 tween components of the evolutionary rate matrices fitted to different regimes of the tree. We  
243 implemented summary statistics that provide a framework to decide whether there is enough  
244 signal in the data to support a model comprised by multiple **R** matrix regimes. First we check  
245 the difference between untransformed **R** matrices (ss-overall), then we contrast the vector of  
246 standard deviations (ss-rates) and the difference between correlation matrices (ss-correlation)  
247 derived from these **R** matrices. The first quantity check for overall changes in the evolutionary  
248 rate matrix whereas the later two quantities check for a shift in the rates of evolution of each  
249 individual trait and the structure of evolutionary integration among traits. We perform tests  
250 by calculating the percentile of the 0 value with respect to the distribution of the difference  
251 between summary statistics computed from the joint posterior distribution of parameter esti-  
252 mates. If the 0 value is within 95% of the density, then there is significant overlap between the  
253 posterior distribution of the corresponding parameter estimates and we cannot reject that the  
254 rate regimes are likely samples from the same distribution.

255 The approach using summary statistics described here is justified by the fact that the models  
256 are nested. This means that it is possible to collapse the posterior distribution of evolution-

ary rate matrices fitted to different regions of the same phylogenetic tree to produce a single distribution if enough overlap is detected. For example, a model with three evolutionary rate matrix regimes can be reduced into a model with two regimes and so on. Thus, the summary statistics tests help us decide whether the posterior distribution between two parameters show enough overlap to justify their collapse into a single one. This argument extends to different attributes of the  $\mathbf{R}$  matrix, such that one can collapse the rates of evolution of the traits into a single regime while accepting a shift in the pattern of evolutionary correlation among traits.

## *Simulation study*

We performed simulations to test the performance of our Bayesian MCMC estimates and the use of summary statistics under different scenarios of correlated and uncorrelated evolution. For each simulation we used rejection sampling to generate a phylogenetic tree with 200 tips and at least one monophyletic clade containing 50 tips under a birth-death model. Then, we simulated data using a multivariate Brownian motion model for three continuous traits with two evolutionary rate matrix regimes, one for the 50 tips clade and another for the background group (Fig. 1). We performed four simulation scenarios: no shift (equal matrices), shift of orientation (positive versus negative evolutionary correlations), shift of rates (same evolutionary correlation but varying rates of evolution), and shift of integration (same rates but different degrees of evolutionary correlation). We applied two treatments for the scenario of shift of rates and shift of integration by varying the magnitude of the shifts. Figure 2 shows the total number of simulation treatments and their true parameter values.

For all simulations we used a uniform prior for the vector of standard deviations, a marginally uniform prior for the correlation matrix (Barnard et al., 2000), and a multivariate normal prior for the vector of phylogenetic means centered in the mean of the tip data for each trait and with standard deviation equal to two times the standard deviation of the tip data (Fig. 3). We chose an informative prior for the phylogenetic mean in order to facilitate the convergence of the MCMC chains, since the root values are not the primary focus of this set of simulations. Nevertheless, we repeated a subset of the simulations using a uninformative prior assigned to the root values to show that the MCMC also performs well under this scenario. For each simulation treatment we performed 100 replicates, each replicate composed by two independent MCMC

286 chains of 500,000 generations. The initial state of every MCMC chain was set to a random  
 287 draw from its prior distribution. We checked for convergence using the Gelman and Rubin  
 288 (1992) test applied to each parameter of the model (each element of the root values, standard  
 289 deviation vector, and correlation matrix was considered a separate parameter). We plotted  
 290 the distribution of the percentiles of the true parameter values for the simulations compared  
 291 to the posterior distributions to show the proportion of MCMC estimates that contained the  
 292 true value of the simulation within the 95% highest probability density (HPD) interval. We  
 293 simulated phylogenies, traits and mapped regimes using the R package **phytools** (Revell, 2012)  
 294 and performed all parameter estimates with the package **ratematrix** (Caetano and Harmon,  
 295 2017).

296 In order to check for congruence between our approach and maximum likelihood estimators,  
 297 we used the R package **mvMORPH** (Clavel et al., 2015) to find the best model using likelihood ratio  
 298 tests (one regime versus two regimes) for all simulated scenarios. We compared the results from  
 299 the MCMC with the maximum likelihood estimates by calculating the percentile of the MLE  
 300 estimates for the two regimes model with respect to the posterior distributions and checked  
 301 whether the model favored by the likelihood ratio test also showed support when relying on  
 302 the summary statistics computed from the posterior distribution of parameter estimates. The  
 303 comparison between the likelihood ratio test and our posterior check approach is not a formal  
 304 evaluation of model test performance, since the two approaches are fundamentally distinct.  
 305 On the other hand, this serve as a pragmatic comparison to show whether we can adopt the  
 306 use of summary statistics calculated from the posterior distribution to make reliable choices  
 307 between models with direct incorporation of uncertainty in parameter estimates while retaining  
 308 the explanation power of a more formal model testing approach.

### 309 *Empirical examples*

310 We use two examples to show the performance of the approach with empirical datasets and to  
 311 further explore the impact of the direct incorporation of uncertainty in parameter estimates and  
 312 model comparison. The first example tests for a shift in the evolutionary integration among  
 313 anoles traits during the Caribbean radiation. Then, we repeat the analysis from Revell and  
 314 Collar (2009) study on the evolution of buccal traits in Centrarchidae fishes.

315 Anoles are small lizards that live primarily in the tropics. There are nearly 400 anole  
 316 species with diverse morphology and they have become a model system for studies of adaptive  
 317 radiation and convergence (Losos, 2009; Mahler et al., 2013, and references therein). The  
 318 ancestral distribution of the genus is in Central and South America and the history of the clade  
 319 includes island dispersion and radiation as well as dispersal back to the mainland (Nicholson  
 320 et al., 2005; Losos, 2009). The adaptive radiation of anoles to the Caribbean islands and the  
 321 repeated evolution of ecomorphs are the main focus of evolutionary studies in the genus (Mahler  
 322 et al., 2010; Losos, 2009; Mahler et al., 2013). However, mainland anoles are distributed from  
 323 the north of South America to the south of North America and show more species (60% of  
 324 all species) than island anoles and equally impressive morphological diversity (Losos, 2009).  
 325 Mainland and island anole species form distinct morphological clusters (Pinto et al., 2008;  
 326 Schaad and Poe, 2010; Moreno-Arias and Calderón-Espinosa, 2016), but rates of trait evolution  
 327 have been shown not to be consistently different (Pinto et al., 2008). Island ecomorphs can  
 328 be readily distinguished by body size and the morphology of limbs, head and tail (Losos,  
 329 2009; Mahler et al., 2013). Thus, it is plausible that a shift in the structure of evolutionary  
 330 integration among those traits associated with the radiation to the islands played an important  
 331 role on the exploration of novel regions of the morphospace and allowed the repeated evolution  
 332 of specialized morphologies. Herein we test this hypothesis by fitting two evolutionary rate  
 333 matrix regimes, one for mainland and other for island anole lineages.

334 We compiled data for snout-vent length (SVL), tail length (TL), and head length (HL)  
 335 of 125 anole species (99 Caribbean and 26 mainland species) made available by Mahler et al.  
 336 (2013) and Moreno-Arias and Calderón-Espinosa (2016). We chose this set of traits because  
 337 they are important for niche partitioning among anoles (Pinto et al., 2008; Losos, 2009; Mahler  
 338 et al., 2013) and also provided the best species coverage given the data currently available. We  
 339 use Gamble et al. (2014) maximum clade credibility tree for all comparative analyses, but we  
 340 trimmed the phylogeny to include only the species that we have morphological data. To map the  
 341 different **R** matrix regimes to the phylogenetic tree we classified species as ‘island’ or ‘mainland’  
 342 and used the package ‘**phytools**’ (Revell, 2012) to estimate the transition rates between the  
 343 states in both directions using an unconstrained model (e.g., the ‘all rates different’ model) and  
 344 to perform 100 stochastic mapping simulations. We set the model to estimate one **R** matrix for

each mapped state ('island' or 'mainland') and we used the pool of 100 stochastic maps in the MCMC to take into account the uncertainty associated with ancestral state estimation. We ran four independent MCMC chains of 2 million generations each and used a random sample from the prior as the starting point of each chain. We set a uniform prior for the phylogenetic mean, a marginally uniform prior on the correlation matrices and a uniform prior on the vector of standard deviations for the  $\mathbf{R}$  matrices. We discarded 25% of each MCMC chain as burn-in and checked for convergence using the potential scale reduction factor (Gelman and Rubin, 1992). In order to test the influence of the root state for the rate regimes, we repeated the analyses by setting the root state for the stochastic mapping simulations as a random sample between 'island' and 'mainland' and with the ancestral distribution fixed as 'mainland'.

In addition to the analyses of mainland and island anoles lizards, we replicated the study by Revell and Collar (2009) as an exercise to contrast the inference of evolutionary rate matrices in the presence of a direct estimate of uncertainty provided by the posterior densities. Revell and Collar (2009) showed that the evolution of a specialized piscivorous diet in fishes of the genus *Micropterus* is associated with a shift towards a stronger evolutionary correlation between buccal length and gape width (see Fig. 1 in Revell and Collar, 2009). This tighter integration might have allowed *Micropterus* lineages to evolve better suction feeding performance. For this analysis we used the same data and phylogenetic tree made available by the authors. We set prior distributions using the same approach for the analysis of anole lizards described above. We also ran four MCMC chains starting from random draws from the prior for 1 million generations and checked for convergence using the potential scale reduction factor (Gelman and Rubin, 1992).

## Results

### *Performance of the method*

We ran a total of 1,200 Markov chain Monte Carlo chains to check the performance of the model under six different scenarios of correlated evolution among traits. All chains finished without errors, showed good convergence after 500,000 generations and results were congruent both with the true simulation parameters and with maximum likelihood estimates (Table 1

and Fig. 4). Figures 2 and S1 show examples of the posterior distribution of evolutionary rate matrices and root values for each simulation scenario. Changing the prior distribution for the vector of root values from multivariate normal to uniform showed no detectable bias in the posterior distribution, however the MCMC required approximately twice as many iterations to converge (Fig. S2). The distribution of percentiles for both the MLE and the true value for the simulations with respect to the posterior distribution of parameter estimates were, on average, within the 95% highest posterior density interval (Fig. 4). The likelihood ratio tests supported the two rates model about as often as our test based on summary statistics across all simulation scenarios (Table 1). When data was simulated with a single evolutionary rate matrix across the tree but tested for two regimes, both the likelihood ratio tests and the summary statistics (ss-overall) resulted in less than 5% of the 100 replicates with support for the wrong model.

Alternatively, one might be interested on shifts in some of the attributes of the evolutionary rate matrices more than others, such as specific hypotheses about the change in the pattern of evolutionary integration without *a priori* expectations about shifts in the rates of trait evolution. Table 1 shows the results of the summary statistics approach with respect to different attributes of the evolutionary rate matrices fitted to the data. These results are congruent with the simulation scenarios and show that the approach using summary statistics calculated from the posterior distribution of parameter estimates is a reliable and flexible way to identify changes in rates of trait evolution (ss-rates) or shifts in the pattern of evolutionary integration (ss-correlation).

### Empirical examples

The biogeographic reconstruction using a more recent anole phylogeny (Gamble et al., 2014) is mostly congruent with previous studies (Glor et al., 2005; Nicholson et al., 2005; Losos, 2009). There are multiple radiations from mainland South America to the Caribbean islands and a single radiation from the islands back to mainland South America (Fig. 5). In contrast, the Jamaican clade (*A. reconditus* + *A. grahami*), that previous results have shown to be sister to the clade that dispersed from the Caribbean islands back to mainland (Losos, 2009), is now nested within this secondary radiation. These results are maintained when we used all species from Gamble et al. (2014) instead of the trimmed tree (see Fig. S3). The **R** matrix estimates for

each regime show no difference in the structure of integration but the rates of evolution for the Caribbean anole lineages are twice as fast as mainland lineages (Fig. 5, see also figures S4 for the posterior of root values and S5 for trace plots). In other words, the evolutionary rate matrix for the two regimes are proportional (ss-overall=0.004, ss-rates=0.0002, and ss-correlation=0.4). Setting the root state as ‘mainland’ does not influence the posterior distribution of parameter estimates. Head length and tail length are positively correlated along the phylogeny and also show a strong positive evolutionary correlation with body size.

In the case of the Centrarchidae fishes, there is a clear distinction between the results of the maximum likelihood point estimate and the Bayesian estimate of the evolutionary rate matrix regimes. Under MLE, we found a significant difference between the **R** matrix regimes using likelihood ratio tests. There is a stronger evolutionary correlation between the gape width and the buccal length of the *Micropterus* clade ( $r=0.83$ ) when compared with other lineages ( $r=0.36$ ). In contrast, the direct incorporation of uncertainty in parameter estimates reveal an important overlap between the posterior densities for the **R** matrices estimated for each regime (Fig. 6, see also figures S6 for the posterior of root values and S7 for trace plots). The posterior density does not show evidence of a shift towards stronger evolutionary correlation between gape width and buccal length in *Micropterus* (ss-correlation=0.46) and the overall overlap between the posterior of evolutionary rate matrix fitted to each regime is pronounced (ss-overall=0.58). Thus, after taking the uncertainty in parameter estimates into account, it is unlikely that a shift on the pattern of evolutionary correlation happened in the *Micropterus* clade.

## Discussion

Here we implemented a Bayesian Markov chain Monte Carlo estimate of the evolutionary rate matrix. Our approach allows multiple regimes to be fitted to the same phylogenetic tree and integrates over a sample of trees or regime configurations to account for uncertainty in ancestral state estimates and phylogenetic inference. We also implement summary statistics to compare the posterior distribution of parameter estimates for different regimes. We show that our approach has good performance over a series of different scenarios of evolutionary integration and is congruent with parameter estimates using maximum likelihood. The use of maximum

431 likelihood estimate is definitely faster, since the MCMC chain requires many more evaluations  
 432 of the likelihood function. However, our new extension of Felsenstein (1973) pruning algorithm  
 433 applied when multiple **R** matrices are fitted to the same tree reduces the computation time of  
 434 the likelihood for the model significantly. The integration of uncertainty in parameter estimates  
 435 provided by the posterior distribution and the use of summary statistics to describe patterns  
 436 in the data that can be directly relevant to our biological predictions are significant rewards  
 437 for the longer time invested in data analysis.

438 The use of summary statistics to evaluate the overlap between the posterior distributions  
 439 of parameter estimates from different regimes is a intuitive and reliable framework to make  
 440 decisions of whether or not the data show a strong signal for multiple regimes. Our simulations  
 441 showed that results from this approach are, in average, congruent with the likelihood ratio test.  
 442 More importantly, summary statistics computed from the posterior distribution can recognize  
 443 meaningful discrepancies between distinct evolutionary rate matrix regimes across a series of  
 444 simulation scenarios. In this study we focused on the evolutionary rates for each trait (ss-rates)  
 445 and the evolutionary correlation among traits (ss-correlation), but any other summary statistics  
 446 computed over the posterior distribution of parameter estimates and representing an attribute  
 447 of the model relevant for a given question could be implemented. For example, characteristics  
 448 of the eigen-structure of the matrices or more formal tests such as the Flury hierarchy (Phillips  
 449 and Arnold, 1999) could be also implemented. This framework is flexible, does not require  
 450 an estimate of the marginal likelihood and can be easily tailored towards specific biological  
 451 predictions of the study system. On the other hand, it is important to note that the use  
 452 of summary statistics does not constitute a formal model test, but instead asks the question  
 453 of whether the parameter estimates for the regimes are distinct enough for us to accept the  
 454 hypothesis of heterogeneity in the tempo and mode of trait evolution.

455 Point estimates such as the maximum likelihood can generate a false impression of certainty  
 456 that may limit our biological interpretations if not accompanied by estimates of the variance.  
 457 It is possible to calculate the confidence interval around the MLE and use this interval to check  
 458 for overlaps in the parameter estimates (i.e., using the Hessian matrix). The disadvantage of  
 459 this approach is that the confidence interval provides only the percentiles of the density around  
 460 the MLE. As a result, it is not possible to calculate summary statistics, incorporate uncertainty

in downstream analyses, or to provide a visualization of the distribution of parameter estimates such as in this study (see Figures 2 and 6). Maximum likelihood estimate of models of trait evolution are commonly reported without any estimate of the variance, most likely because the focus are often on the results of model tests and p values rather than in our ability to reliably estimate and interpret the parameters of a model (see discussion in Beaulieu and O'Meara, 2016 on a related issue). Furthermore, model tests such as the likelihood ratio test and the Akaike information criteria (AIC) do not incorporate any measure of the variance of estimates in their calculations. This is problematic when parameters can be hard to estimate and models are challenged by reduced sample sizes, which is a common issue in phylogenetic comparative methods analyses in general.

The analysis of mouth shape evolution in function of diet in Centrarchidae fishes (Revell and Collar, 2009) is an interesting example of the impact of uncertainty in parameter estimates on our biological conclusions. The likelihood ratio test showed a strong support for a shift in the structure of evolutionary correlation associated with the evolution of piscivory in the *Micropterus* clade. In contrast, the summary statistics computed from the posterior distribution did not show strong evidence for the same scenario of macroevolution. When we contrast the result from the MLE with the posterior distribution (Fig. S8), we can visualize the origin of the incongruence. The likelihood ratio test focus on the relative fit of the constrained model (one regime) compared with the full model (two regimes) whereas the summary statistics compute whether our posterior knowledge about the model reflects a strong signal for a shift between regimes using the overlap between the posterior distribution of parameter estimates. Furthermore, the same trend can be shown by computing the confidence interval around the MLE estimates, since there is an important overlap between the **R** matrices fitted to each regime.

The results from the test of whether mainland and island anole species differ in the pattern of evolutionary integration among traits are intriguing. The posterior distribution of evolutionary rate matrices fitted to each regime show a constant pattern of evolutionary integration whereas rates of trait evolution are faster on island anole lineages. The radiation of anole lizards on the Caribbean islands is one of the most striking examples of adaptive radiation in evolutionary biology. It is natural to expect that a shift in the trajectory of evolution of

491 morphological traits associated with ecomorphs would occur, since mainland and island anole  
 492 species are known to occupy different regions of the morphospace (Pinto et al., 2008; Schaad  
 493 and Poe, 2010; Moreno-Arias and Calderón-Espinosa, 2016). Surprisingly, our results suggest  
 494 that ecomorphs evolved under a constant pattern of evolutionary integration among traits  
 495 when compared with mainland lineages but differ due to faster rates of trait evolution. One  
 496 hypothesis is that the evolutionary correlation among traits, which determine the major axes  
 497 of morphological evolution in the group, do not act as a constraint to the exploration of the  
 498 morphospace by the lineages. Thus, island and mainland anole lineages are not distinct in their  
 499 potential to explore the morphospace and ecomorphs might be special in the sense of repetitive  
 500 radiations and not due to exclusive morphological evolution when compared to their mainland  
 501 counterparts. This explanation has some support by the fact that a few mainland species are  
 502 morphologically similar to island ecomorphs (Schaad and Poe, 2010). In contrast, higher rates  
 503 of evolution is most likely a reflection of the rapid morphological differentiation observed on  
 504 the Caribbean anole lineages and associated with the ecological opportunity posed by the new  
 505 island habitats coupled to the reduction in predation risk. Our results corroborate the idea  
 506 that ecomorphs might also have evolved among mainland species since there is no detectable  
 507 shift in the trajectory of evolution among morphological traits. However, efforts to understand  
 508 anole biodiversity, ecology and evolution have been strongly focused on island systems and still  
 509 relatively very little is known about mainland lineages.

## 510 Conclusion

511 Most of what we know about the tempo and mode of trait evolution come from studies of  
 512 individual traits, but evolutionary integration is ubiquitous across the tree of life. Recently we  
 513 have seen an increase in comparative tools aimed to deal with the challenges posed by high-  
 514 dimensional traits, such as shape data. However, the discipline is still in need of better models  
 515 to deal with multiple traits, such as the examples explored in this study. Our framework is  
 516 aimed primarily on the test of shifts in the structure of evolutionary integration among traits  
 517 across clades and over time. However, the implementation of summary statistics make it feasible  
 518 to extend such tests to be focused on any attribute of the evolutionary rate matrix that might  
 519 fit the biological predictions of a specific study. Another important advantage of simulation

520 based approaches, such as the Bayesian MCMC, is that proposals can be modified to integrate  
 521 over different number of regime configurations, distinct models of trait evolution, and even  
 522 simultaneously estimate parameters for the trait evolution model and the phylogenetic tree.  
 523 Thus, our implementation lays the groundwork for future advancements towards flexible models  
 524 to explore multiple facets of the evolution of integration over long time scales using phylogenetic  
 525 trees. Integration among traits is a broad and yet fundamental topic in evolutionary biology.  
 526 Understanding the interdependence among traits over the macroevolutionary scale can be key  
 527 to tie together our knowledge about the genetic basis of traits, development, and adaptive shifts  
 528 in the strength or direction of evolutionary correlation.

## 529 **Funding**

530 D.S.C. was supported by a fellowship from Coordenação de Aperfeiçoamento de Pessoal de Nível  
 531 Superior (CAPES: 1093/12-6) and from Bioinformatics and Computational Biology Program  
 532 at the University of Idaho in partnership with IBEST (the Institute for Bioinformatics and  
 533 Evolutionary Studies). L.J.H. was supported by a grant from National Science Foundation  
 534 (award DEB-1208912).

## 535 **Acknowledgements**

536 We would like to thank Josef Uyeda, Rosana Zenil-Ferguson, Matthew Pennell, Brian Sid-  
 537 lauskas, and Dean Adams for insightful discussions on the topic and Julien Clavel for comments  
 538 on an earlier version of this manuscript.

# References

- Adams, D. C. 2012. Comparing evolutionary rates for different phenotypic traits on a phylogeny using likelihood. *Syst. Biol.* 62:181–192.
- Adams, D. C. 2014a. A generalized K statistic for estimating phylogenetic signal from shape and other high-dimensional multivariate data. *Syst. Biol.* 63:685–697.
- Adams, D. C. 2014b. Quantifying and comparing phylogenetic evolutionary rates for shape and other high-dimensional phenotypic data. *Syst. Biol.* 63:166–177.
- Adams, D. C. and R. N. Felice. 2014. Assessing trait covariation and morphological integration on phylogenies using evolutionary covariance matrices. *PLoS One* 9:e94335.
- Armbruster, W. S., C. Pélabon, G. H. Bolstad, and T. F. Hansen. 2014. Integrated phenotypes: Understanding trait covariation in plants and animals. *Philos. Trans. R. Soc. Lond. B Biol. Sci.* 369:20130245.
- Armbruster, W. S. and K. E. Schwaegerle. 1996. Causes of covariation of phenotypic traits among populations. *J. Evol. Biol.* 9:261–276.
- Arnold, S. J. 1992. Constraints on phenotypic evolution. *Am. Nat.* 140:S85–S107.
- Arnold, S. J., M. E. Pfrender, and A. G. Jones. 2001. The adaptive landscape as a conceptual bridge between micro- and macroevolution. *Genetica* 112-113:9–32.
- Barnard, J., R. McCulloch, and X.-L. Meng. 2000. Modeling covariance matrices in terms of standard deviations and correlations, with application to shrinkage. *Stat. Sinica* 10:1281–1312.
- Bartoszek, K., J. Pienaar, P. Mostad, S. Andersson, and T. F. Hansen. 2012. A phylogenetic comparative method for studying multivariate adaptation. *J. Theor. Biol.* 314:204–215.
- Bolstad, G. H., T. F. Hansen, C. Pélabon, M. Falahati-Anbaran, R. Pérez-Barrales, and W. S. Armbruster. 2014. Genetic constraints predict evolutionary divergence in *Dalechampia* blossoms. *Phil. Trans. R. Soc. B* 369:20130255.

- 564 Burnham, K. P. and D. R. Anderson. 2003. Model Selection and Multimodel Inference: A  
565 Practical Information-Theoretic Approach. 2nd edition ed. Springer, New York.
- 566 Caetano, D. S. and L. J. Harmon. 2017. ratematrix: An R package for studying evolutionary  
567 integration among several traits on phylogenetic trees. bioRxiv .
- 568 Clavel, J., G. Escarguel, and G. Merceron. 2015. mvmorph: An R package for fitting multivari-  
569 ate evolutionary models to morphometric data. *Method. Ecol. Evol.* 6:1311–1319.
- 570 Claverie, T. and S. N. Patek. 2013. Modularity and rates of evolutionary change in a power-  
571 amplified prey capture system. *Evolution* 67:3191–3207.
- 572 Collar, D. C., T. J. Near, and P. C. Wainwright. 2005. Comparative analysis of morphological  
573 diversity: Does disparity accumulate at the same rate in two lineages of centrarchid fishes?  
574 *Evolution* 59:1783–1794.
- 575 Collar, D. C., P. C. Wainwright, M. E. Alfaro, L. J. Revell, and R. S. Mehta. 2014. Biting  
576 disrupts integration to spur skull evolution in eels. *Nature Communications* 5:5505.
- 577 Dececchi, T. A. and H. C. E. Larsson. 2013. Body and limb size dissociation at the origin of  
578 birds: Uncoupling allometric constraints across a macroevolutionary transition. *Evolution*  
579 67:2741–2752.
- 580 Denton, J. S. S. and D. C. Adams. 2015. A new phylogenetic test for comparing multiple high-  
581 dimensional evolutionary rates suggests interplay of evolutionary rates and modularity in  
582 lanternfishes (Myctophiformes; Myctophidae). *Evolution* 69:2425–2440.
- 583 Dines, J. P., E. Otárola-Castillo, P. Ralph, J. Alas, T. Daley, A. D. Smith, and M. D. Dean.  
584 2014. Sexual selection targets cetacean pelvic bones. *Evolution* 68:3296–3306.
- 585 Fan, Y., R. Wu, M.-H. Chen, L. Kuo, and P. O. Lewis. 2011. Choosing among partition models  
586 in Bayesian phylogenetics. *Mol. Biol. Evol.* 28:523–532.
- 587 Felsenstein, J. 1973. Maximum-likelihood estimation of evolutionary trees from continuous char-  
588 acters. *Am. J. Hum. Genet.* 25:471–492.
- 589 Felsenstein, J. 1988. Phylogenies and quantitative characters. *Annu. Rev. Eco. Sys.* 19:445–471.

590 Freckleton, R. P. 2012. Fast likelihood calculations for comparative analyses. *Method. Ecol.*  
591 *Evol.* 3:940–947.

592 Gamble, T., A. J. Geneva, R. E. Glor, and D. Zarkower. 2014. *Anolis* sex chromosomes are  
593 derived from a single ancestral pair. *Evolution* 68:1027–1041.

594 Gelman, A. and D. B. Rubin. 1992. Inference from iterative simulation using multiple sequences.  
595 *Stat. Sci.* 7:457–472.

596 Glor, R. E., J. B. Losos, and A. Larson. 2005. Out of Cuba: Overwater dispersal and speciation  
597 among lizards in the *Anolis carolinensis* subgroup. *Mol. Ecol.* 14:2419–2432.

598 Goolsby, E. W. 2016. Likelihood-based parameter estimation for high-dimensional phylogenetic  
599 comparative models: Overcoming the limitations of “distance-based” methods. *Syst. Biol.*  
600 65:852–870.

601 Goswami, A. 2006. Cranial modularity shifts during mammalian evolution. *Am. Nat.* 168:270–  
602 280.

603 Goswami, A., W. J. Binder, J. Meachen, and F. R. O’Keefe. 2015. The fossil record of pheno-  
604 typic integration and modularity: A deep-time perspective on developmental and evolution-  
605 ary dynamics. *Proc. Natl. Acad. Sci.* 112:4891–4896.

606 Goswami, A., J. B. Smaers, C. Soligo, and P. D. Polly. 2014. The macroevolutionary conse-  
607 quences of phenotypic integration: From development to deep time. *Philos. Trans. R. Soc.*  
608 *Lond. B Biol. Sci.* 369:20130254.

609 Gustavson, F. G., J. Waśniewski, J. J. Dongarra, and J. Langou. 2010. Rectangular full packed  
610 format for Cholesky’s algorithm: Factorization, solution and inversion. *ACM T. Math. Soft-*  
611 *ware* 37:1–33.

612 Hadfield, J. D. and S. Nakagawa. 2010. General quantitative genetic methods for compara-  
613 tive biology: Phylogenies, taxonomies and multi-trait models for continuous and categorical  
614 characters. *J. Evol. Biol.* 23:494–508.

- 615 Hallgrímsson, B., H. A. Jamniczky, N. M. Young, C. Rolian, U. Schmidt-Ott, and R. S. Marcu-  
616 cio. 2012. The generation of variation and the developmental basis for evolutionary novelty.  
617 J. Exp. Zool. B Mol. Dev. Evol. 318:501–517.
- 618 Hansen, T. F. and D. Houle. 2004. Evolvability, Stabilizing Selection, and the Problem of Stasis.  
619 *in* Phenotypic Integration: Studying the Ecology and Evolution of Complex Phenotypes  
620 (M. Pigliucci and K. Preston, eds.). Oxford University Press.
- 621 Harmon, L. J., J. B. Losos, T. Jonathan Davies, R. G. Gillespie, J. L. Gittleman, W. Bryan Jen-  
622 nings, K. H. Kozak, M. A. McPeck, F. Moreno-Roark, T. J. Near, A. Purvis, R. E. Ricklefs,  
623 D. Schluter, J. A. Schulte II, O. Seehausen, B. L. Sidlauskas, O. Torres-Carvajal, J. T. Weir,  
624 and A. Ø. Mooers. 2010. Early bursts of body size and shape evolution are rare in comparative  
625 data. *Evolution* 64:2385–2396.
- 626 Hastings, W. K. 1970. Monte Carlo sampling methods using Markov chains and their applica-  
627 tions. *Biometrika* 57:97–109.
- 628 Hohenlohe, P. A. and S. J. Arnold. 2008. MIPoD: A hypothesis-testing framework for microevo-  
629 lutionary inference from patterns of divergence. *Am. Nat.* 171:366–385.
- 630 Huelsenbeck, J. P., R. Nielsen, and J. P. Bollback. 2003. Stochastic mapping of morphological  
631 characters. *Syst. Biol.* 52:131–158.
- 632 Huelsenbeck, J. P. and B. Rannala. 2003. Detecting correlation between characters in a com-  
633 parative analysis with uncertain phylogeny. *Evolution* 57:1237–1247.
- 634 Hunt, G., M. J. Hopkins, and S. Lidgard. 2015. Simple versus complex models of trait evolution  
635 and stasis as a response to environmental change. *Proc. Natl. Acad. Sci.* 112:4885–4890.
- 636 Immler, S., A. Gonzalez-Voyer, and T. R. Birkhead. 2012. Distinct evolutionary patterns of  
637 morphometric sperm traits in passerine birds. *Proc. R. Soc. Lond. B. Biol. Sci.* 279:4174–  
638 4182.
- 639 Kass, R. E. and A. E. Raftery. 1995. Bayes Factors. *J. Am. Stat. Ass.* 90:773–795.

- 640 Klingenberg, C. and J. Marugán-Lobón. 2013. Evolutionary covariation in geometric morpho-  
641 metric data: Analyzing integration, modularity, and allometry in a phylogenetic context.  
642 Syst. Biol. 62:591–610.
- 643 Klingenberg, C. P. 2014. Studying morphological integration and modularity at multiple levels:  
644 Concepts and analysis. Philos. Trans. R. Soc. Lond. B Biol. Sci. 369:20130249.
- 645 Lande, R. 1979. Quantitative genetic analysis of multivariate evolution, applied to brain: Body  
646 size allometry. Evolution 33:402–416.
- 647 Losos, J. B. 2009. Lizards in an Evolutionary Tree: Ecology and Adaptive Radiation of Anoles.  
648 University of California Press.
- 649 Mahler, D. L., T. Ingram, L. J. Revell, and J. B. Losos. 2013. Exceptional convergence on the  
650 macroevolutionary landscape in island lizard radiations. Science 341:292–295.
- 651 Mahler, D. L., L. J. Revell, R. E. Glor, and J. B. Losos. 2010. Ecological opportunity and the  
652 rate of morphological evolution in the diversification of greater Antillean anoles. Evolution  
653 64:2731–2745.
- 654 Melo, D., A. Porto, J. M. Cheverud, and G. Marroig. 2016. Modularity: Genes, development,  
655 and evolution. Annu. Rev. Ecol. Evol. Syst. 47:463–486.
- 656 Metropolis, N., A. W. Rosenbluth, M. N. Rosenbluth, A. H. Teller, and E. Teller. 1953. Equation  
657 of state calculations by fast computing machines. J. Chem. Phys. 21:1087–1092.
- 658 Monteiro, L. R. and M. R. Nogueira. 2010. Adaptive radiations, ecological specialization, and  
659 the evolutionary integration of complex morphological structures. Evolution 64:724–744.
- 660 Moreno-Arias, R. A. and M. L. Calderón-Espinosa. 2016. Patterns of morphological diversi-  
661 fication of mainland *Anolis* lizards from northwestern South America. Zool. J. Linn. Soc.  
662 176:632–647.
- 663 Nicholson, K. E., R. E. Glor, J. J. Kolbe, A. Larson, S. Blair Hedges, and J. B. Losos.  
664 2005. Mainland colonization by island lizards: Mainland colonization by *Anolis*. J. Biogeogr.  
665 32:929–938.

666 Olson, E. and R. Miller. 1958. Morphological integration. Univ. of Chicago Press, Chicago, IL.

667 Phillips, P. C. and S. J. Arnold. 1999. Hierarchical comparison of genetic variance-covariance  
668 matrices. I. Using the Flury hierarchy. *Evolution* 53:1506–1515.

669 Pinto, G., D. L. Mahler, L. J. Harmon, and J. B. Losos. 2008. Testing the island effect in  
670 adaptive radiation: Rates and patterns of morphological diversification in Caribbean and  
671 mainland *Anolis* lizards. *Proc. R. Soc. B* 275:2749–2757.

672 Revell, L. J. 2009. Size-correction and principal components for interspecific comparative stud-  
673 ies. *Evolution* 63:3258–3268.

674 Revell, L. J. 2012. phytools: An R package for phylogenetic comparative biology (and other  
675 things). *Method. Ecol. Evol.* 3:217–223.

676 Revell, L. J. and D. C. Collar. 2009. Phylogenetic analysis of the evolutionary correlation using  
677 likelihood. *Evolution* 63:1090–1100.

678 Revell, L. J. and L. J. Harmon. 2008. Testing quantitative genetic hypotheses about the evolu-  
679 tionary rate matrix for continuous characters. *Evol. Ecol. Res.* 10:311–331.

680 Schaad, E. W. and S. Poe. 2010. Patterns of ecomorphological convergence among mainland  
681 and island *Anolis* lizards. *Biol. J. Linnean Soc.* 101:852–859.

682 Schluter, D. 1996. Adaptive radiation along genetic lines of least resistance. *Evolution* 50:1766–  
683 1774.

684 Thomas, G. H., S. Meiri, and A. B. Phillimore. 2009. Body size diversification in *Anolis*: Novel  
685 environment and island effects. *Evolution* 63:2017–2030.

686 Uyeda, J. C., D. S. Caetano, and M. W. Pennell. 2015. Comparative analysis of principal  
687 components can be misleading. *Syst. Biol.* 64:677–689.

688 Uyeda, J. C. and L. J. Harmon. 2014. A novel Bayesian method for inferring and interpreting  
689 the dynamics of adaptive landscapes from phylogenetic comparative data. *Syst. Biol.* 63:902–  
690 918.

691 Villmoare, B. 2012. Morphological integration, evolutionary constraints, and extinction: A  
692 computer simulation-based study. *Evol. Biol.* 40:76–83.

693 Xie, W., P. O. Lewis, Y. Fan, L. Kuo, and M. H. Chen. 2011. Improving marginal likelihood  
694 estimation for Bayesian phylogenetic model selection. *Syst. Biol.* 60:150–160.

695 Young, N. M. and B. Hallgrímsson. 2005. Serial homology and the evolution of mammalian  
696 limb covariation structure. *Evolution* 59:2691–2704.

697 Young, N. M., G. P. Wagner, and B. Hallgrímsson. 2010. Development and the evolvability of  
698 human limbs. *Proc. Natl. Acad. Sci. USA* 107:3400–3405.

699 Zhang, X., W. J. Boscardin, and T. R. Belin. 2006. Sampling correlation matrices in Bayesian  
700 models with correlated latent variables. *J. Comp. Graph. Stat.* 15:880–896.

Table 1: Proportion of simulation replicates showing support for two  $\mathbf{R}$  matrix regimes under likelihood ratio test (LRT) and using summary statistics computed from the posterior distribution of parameter estimates. The ‘ss-overall’ summary statistics compares the entire evolutionary rate matrix, ‘ss-rates’ refers to the rates of evolution for the individual traits and ‘ss-correlation’ represents only the structure of evolutionary correlation among traits. Simulations were performed with no shift (Single), shift of orientation (Orient), weak shift of rates (Rates I), strong shift of rates (Rates II), weak shift of integration (Integ I), and strong shift of integration (Integ II). Figure 2 show the true value for each simulation and a plot of the posterior distribution of one simulation replicate and S1 show the posterior distribution of root values.

|                | Single | Orient | Rates I | Rates II | Integ I | Integ II |
|----------------|--------|--------|---------|----------|---------|----------|
| LRT            | 0.04   | 1      | 1       | 1        | 0.25    | 0.98     |
| ss-overall     | 0.02   | 1      | 0.85    | 1        | 0.28    | 0.84     |
| ss-rates       | 0.01   | 0.04   | 0.98    | 1        | 0.03    | 0.02     |
| ss-correlation | 0.01   | 1      | 0.06    | 0.03     | 0.26    | 1        |

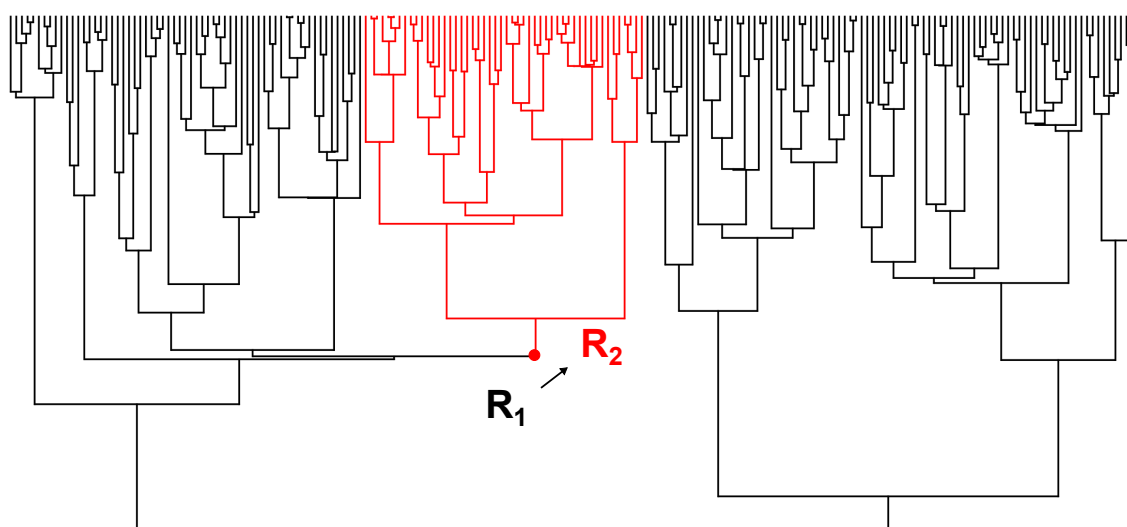

Figure 1: Example of phylogeny used for the simulation study. We simulated phylogenies with 200 tips using a homogeneous birth-death model. Then, we randomly selected one node with exact 50 daughter tips to set the location of the transition between the background rate regime  $R_1$  and the focus clade regime  $R_2$  showed in red.

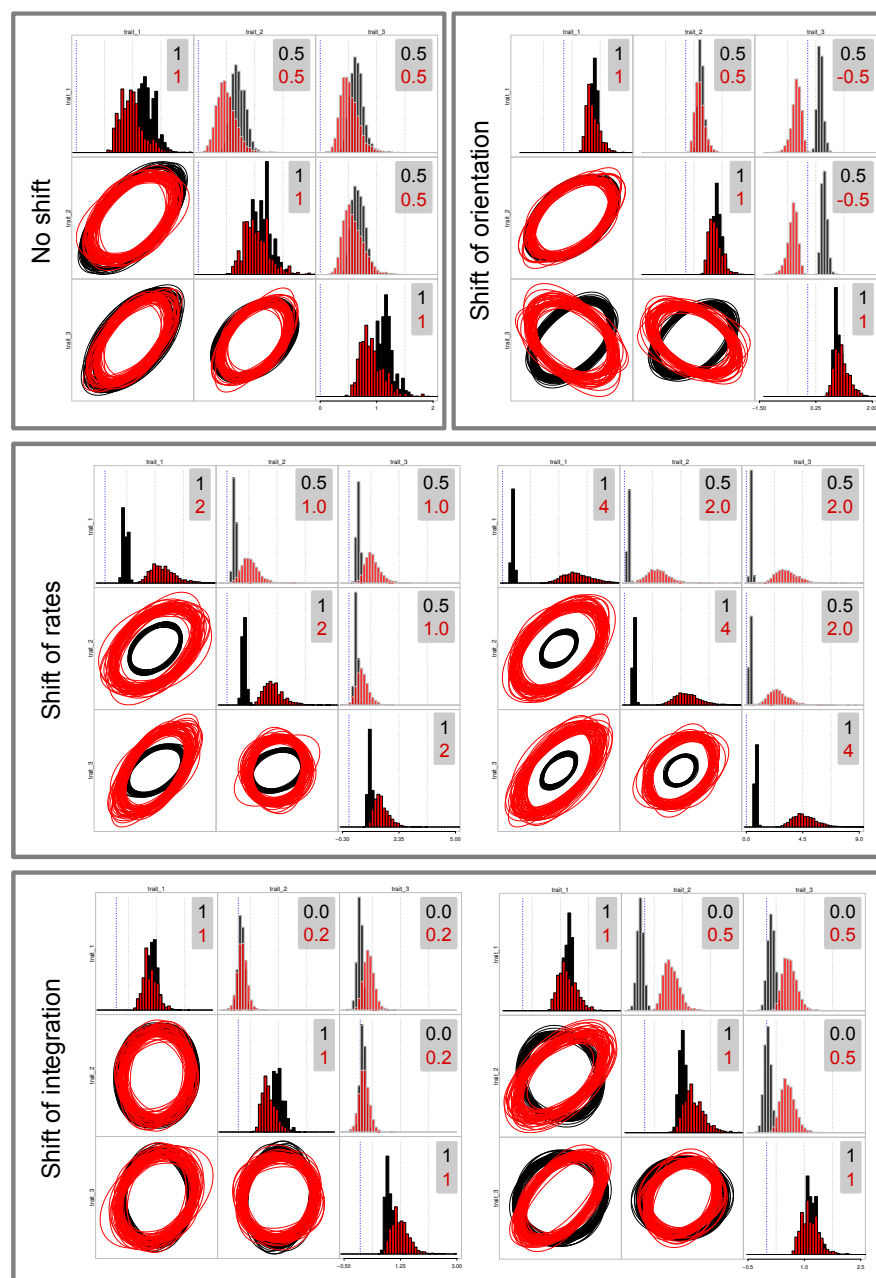

Figure 2: Example of posterior distribution for the six simulation treatments with three traits each. Top-left plot shows the results with no shift in the evolutionary rate matrix regime and top-right shows the results with a shift in the orientation of  $\mathbf{R}$ . Middle row are results with a shift in the rates of evolution of each trait and bottom row shows the results when the strength of the evolutionary correlation shifts between regimes. Estimates for the background regime are showed in black and for the focus regime in red (see Fig. 1). For each plot: diagonal histograms show evolutionary rates (variances) for each trait, upper-diagonal histograms show pairwise evolutionary covariation (covariances), and lower-diagonal ellipses are samples from the posterior distribution showing the 95% confidence interval of each bivariate distribution. Numbers in the top left of histograms are the true value used for each simulation; background rate regimes are showed in black and focus clade regimes in red. Table 1 shows the aggregate results for each simulation replicate: ‘Single’ and ‘Orient’ correspond to top-left and top-right plots. ‘Rates’ I and II are middle row left and right plots. ‘Integ’ I and II are bottom row left and right plots. The two replicates in the middle and bottom rows differ in the strength of the shift between regimes, left is weak and right is strong shift.

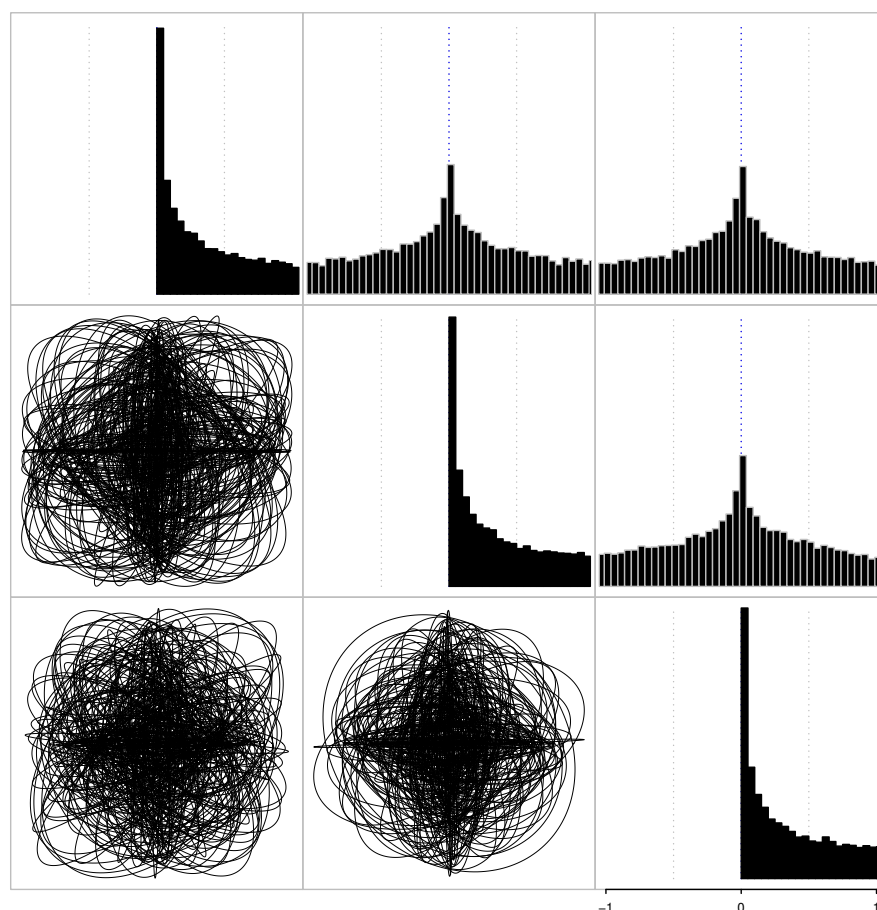

Figure 3: Prior distribution for the evolutionary rate matrix ( $\mathbf{R}$ ) used for all analyses. Plate shows samples in the interval between -1 and 1 from the prior for a model with three traits. Diagonal plots represent the prior for evolutionary rates (variances) for each trait, upper-diagonal plots show pairwise evolutionary covariation (covariances), and lower-diagonal are samples from the posterior distribution of ellipses showing the 95% confidence interval of each bivariate distribution.

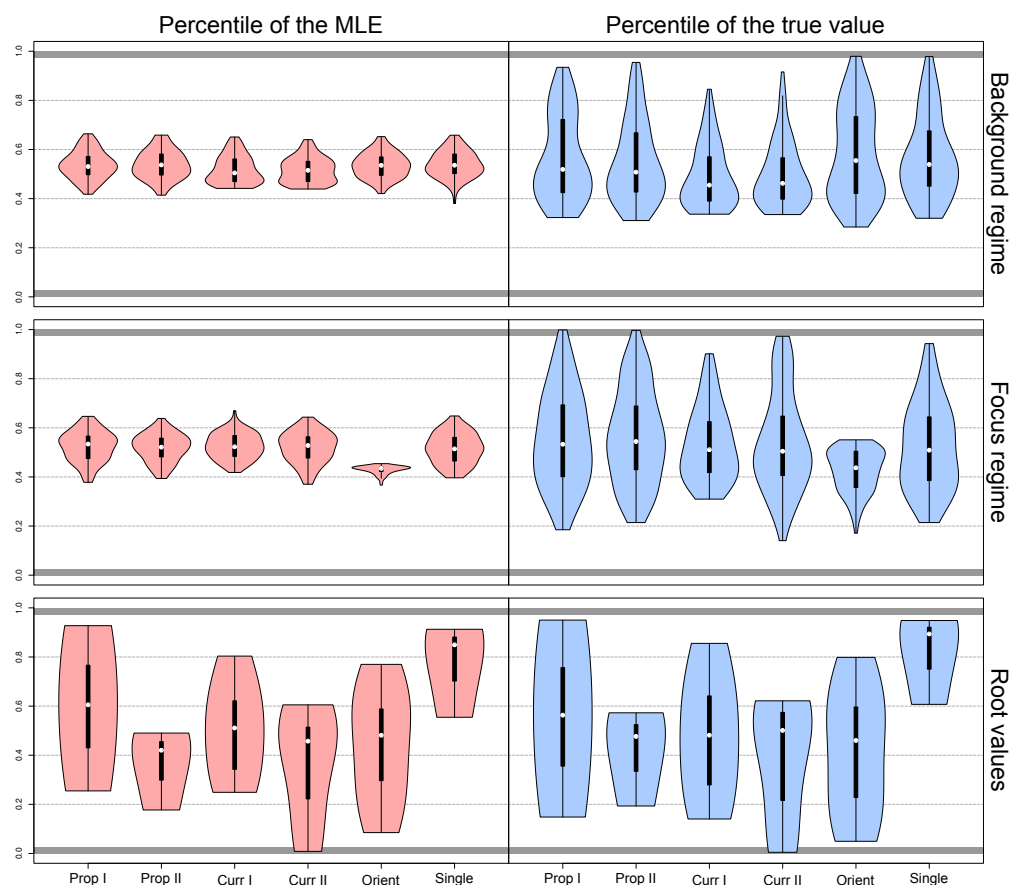

Figure 4: Distribution of percentiles for the maximum likelihood estimate (MLE) of the full model and for the true value of the simulations with respect to the posterior distribution of each simulation replicate. Plots to the left (pink) show the percentiles for the MLE whereas plots to the right (blue) show the percentiles for the true value of the simulations. Most of the density across all simulation scenarios and parameters is within the 95% HPD of the posterior distribution.

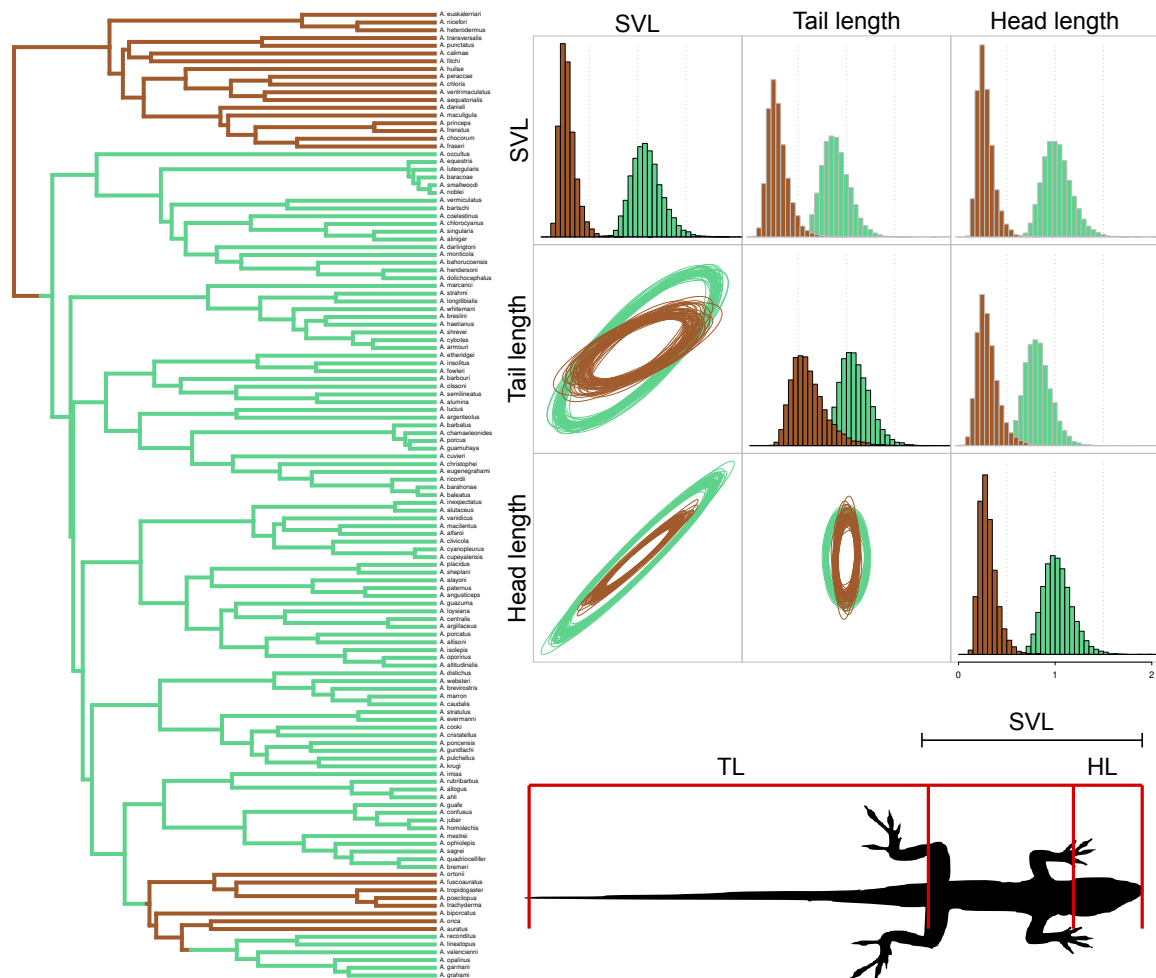

Figure 5: Posterior distribution of the **R** matrix regimes fitted to the island anole (green) and mainland anole (brown) lineages. Left figure shows the maximum clade credibility tree (MCC) from Gamble et al. (2014) with only the taxa used in this study. State reconstruction for the branches was performed with a stochastic map simulation using ‘mainland’ as the root state for the genus. Right upper plot shows the posterior distribution of parameter estimates for the evolutionary rate matrices. Diagonal plots show evolutionary rates (variances) for each trait, upper-diagonal plots show pairwise evolutionary covariation (covariances), and lower-diagonal are samples from the posterior distribution of ellipses showing the 95% confidence interval of each bivariate distribution. Right bottom figure shows a representation of each trait (TL: tail length; HL: head length; SVL: snout-vent length).

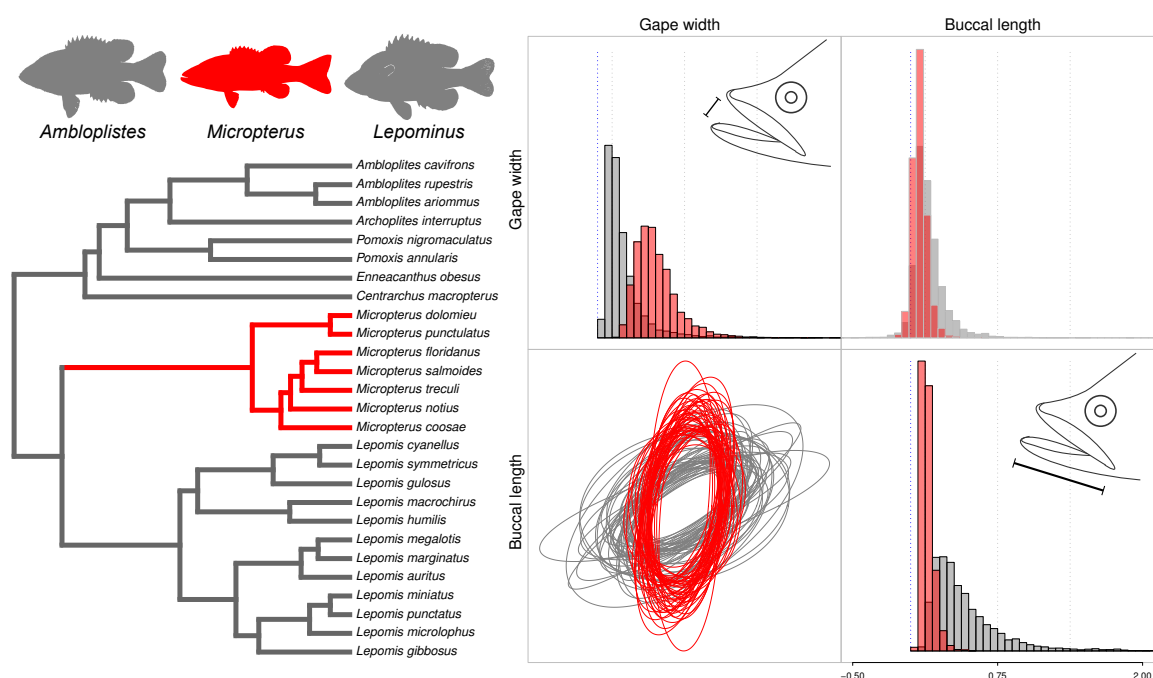

Figure 6: Posterior distribution of the  $\mathbf{R}$  matrix regimes fitted to the background group (gray) and to the *Micropterus* clade (red). Left figure shows the phylogeny from (Revell and Collar, 2009) and the silhouette of some representatives of the Centrarchidae genera. Right plot shows the posterior distribution of parameter estimates for the evolutionary rate matrices. Diagonal plots show evolutionary rates (variances) for each trait, upper-diagonal plots show pairwise evolutionary covariation (covariances), and lower-diagonal are samples from the posterior distribution of ellipses showing the 95% confidence interval of each bivariate distribution.

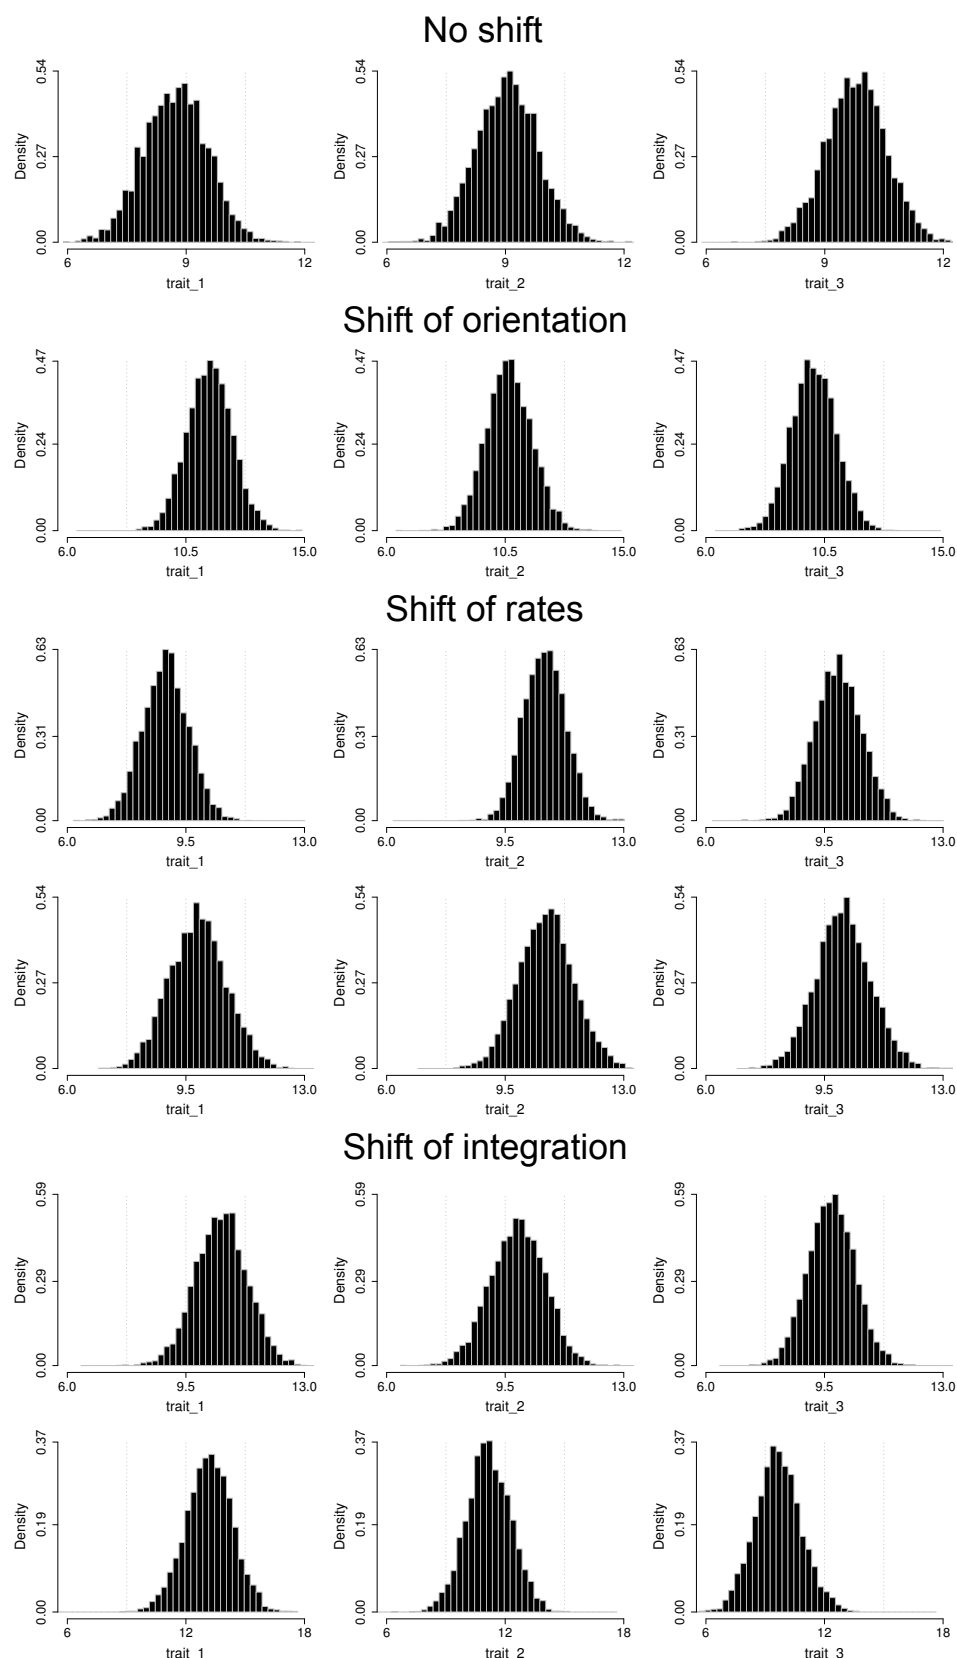

Figure S1: Example of posterior distribution of root values for the six simulation treatments with three traits each. Simulation treatments are the same as showed on Figure 2. Top and bottom plots for ‘Shift of rates’ and ‘Shift of integration’ treatments correspond to the left and right plots of the same treatments on Figure 2, respectively. The true value for the ancestral state of each trait in all simulations was equal to 10.

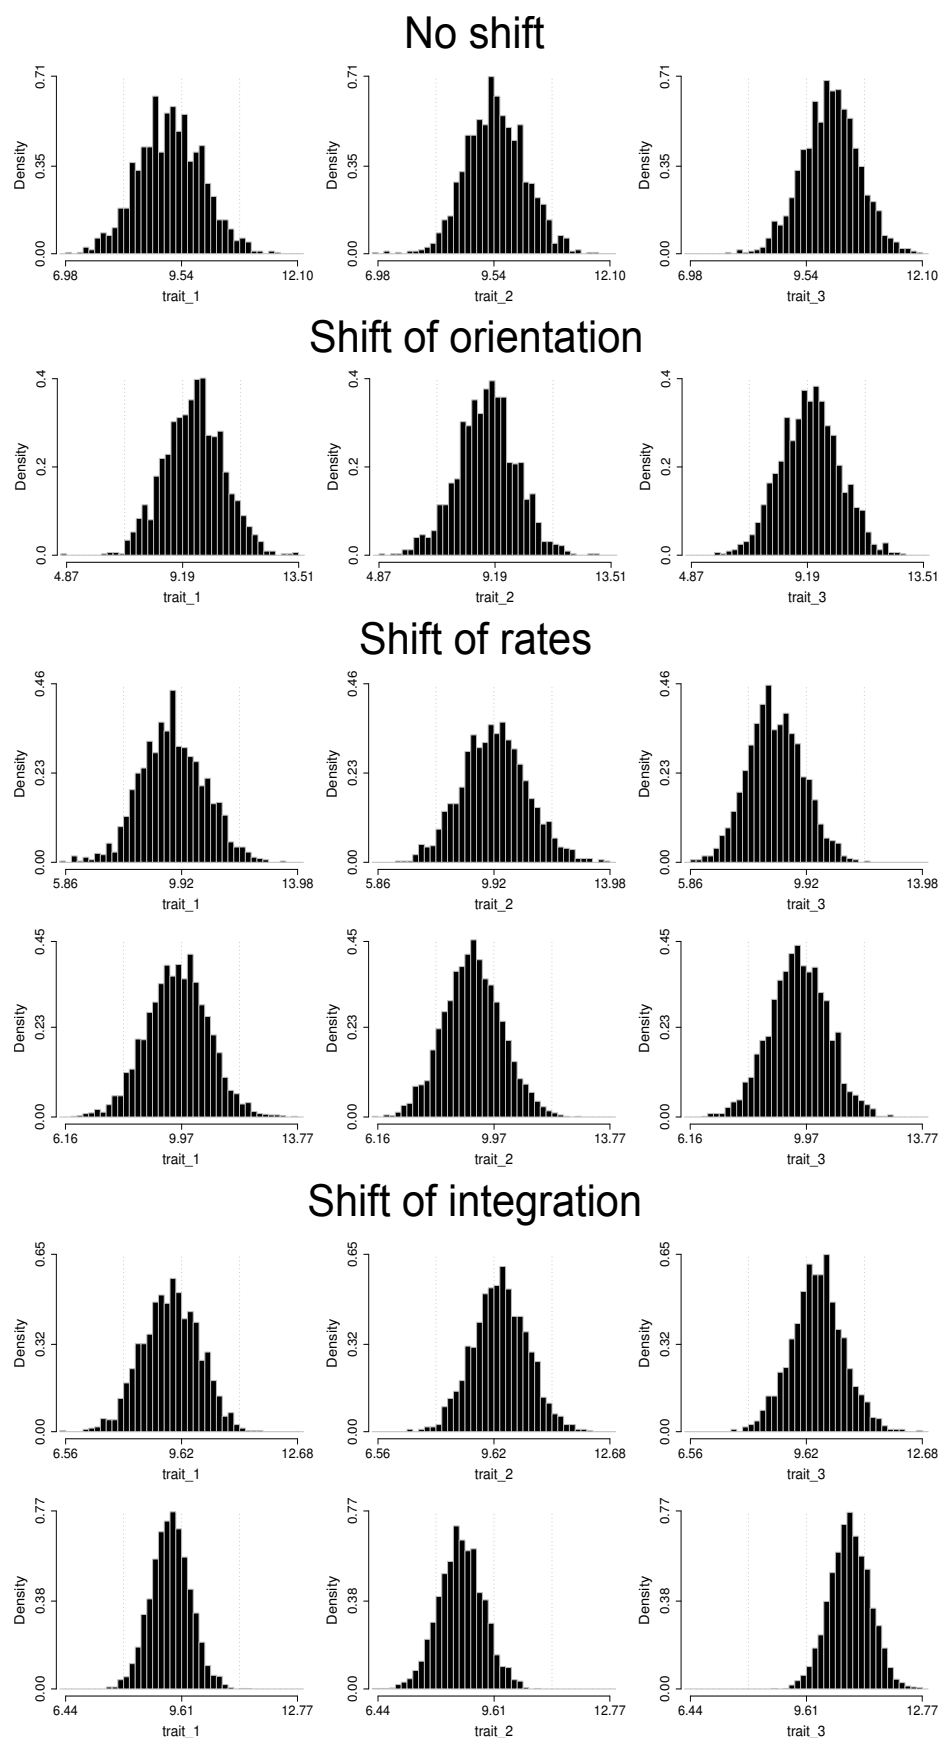

Figure S2: Example of posterior distribution of root values for the six simulation treatments with three traits each using a uniform prior for the vector of root values. Simulation treatments are the same as showed on Figure 2 and Figure S1. The true value for the ancestral state of each trait in all simulations was equal to 10.



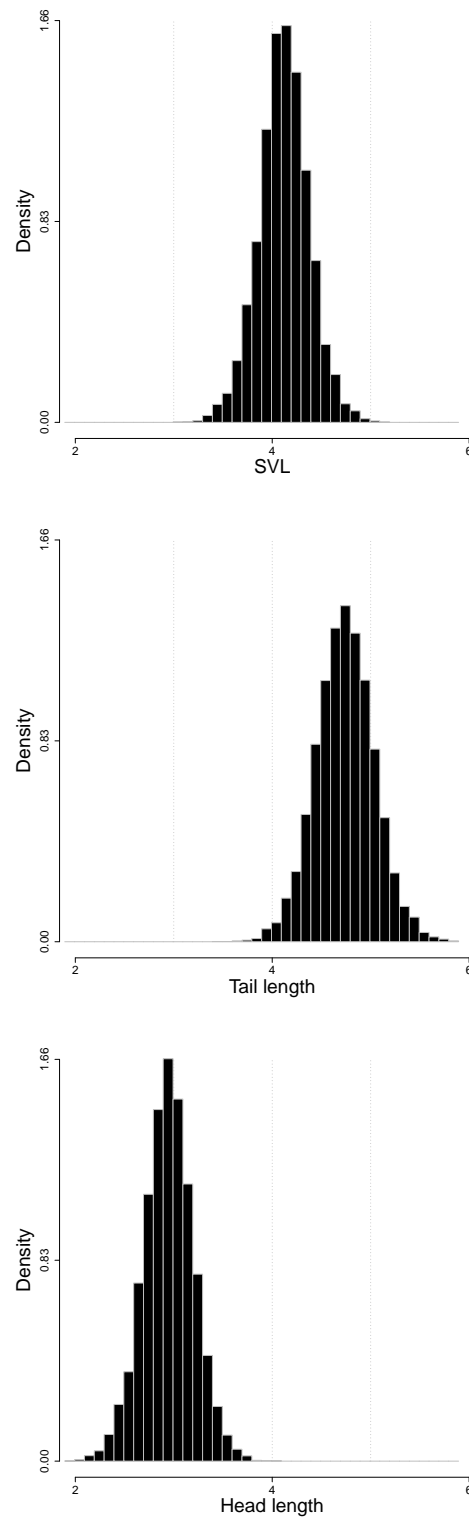

Figure S4: Posterior distribution of root values fitted to the island and mainland anole lineages (SVL: snout-vent length).

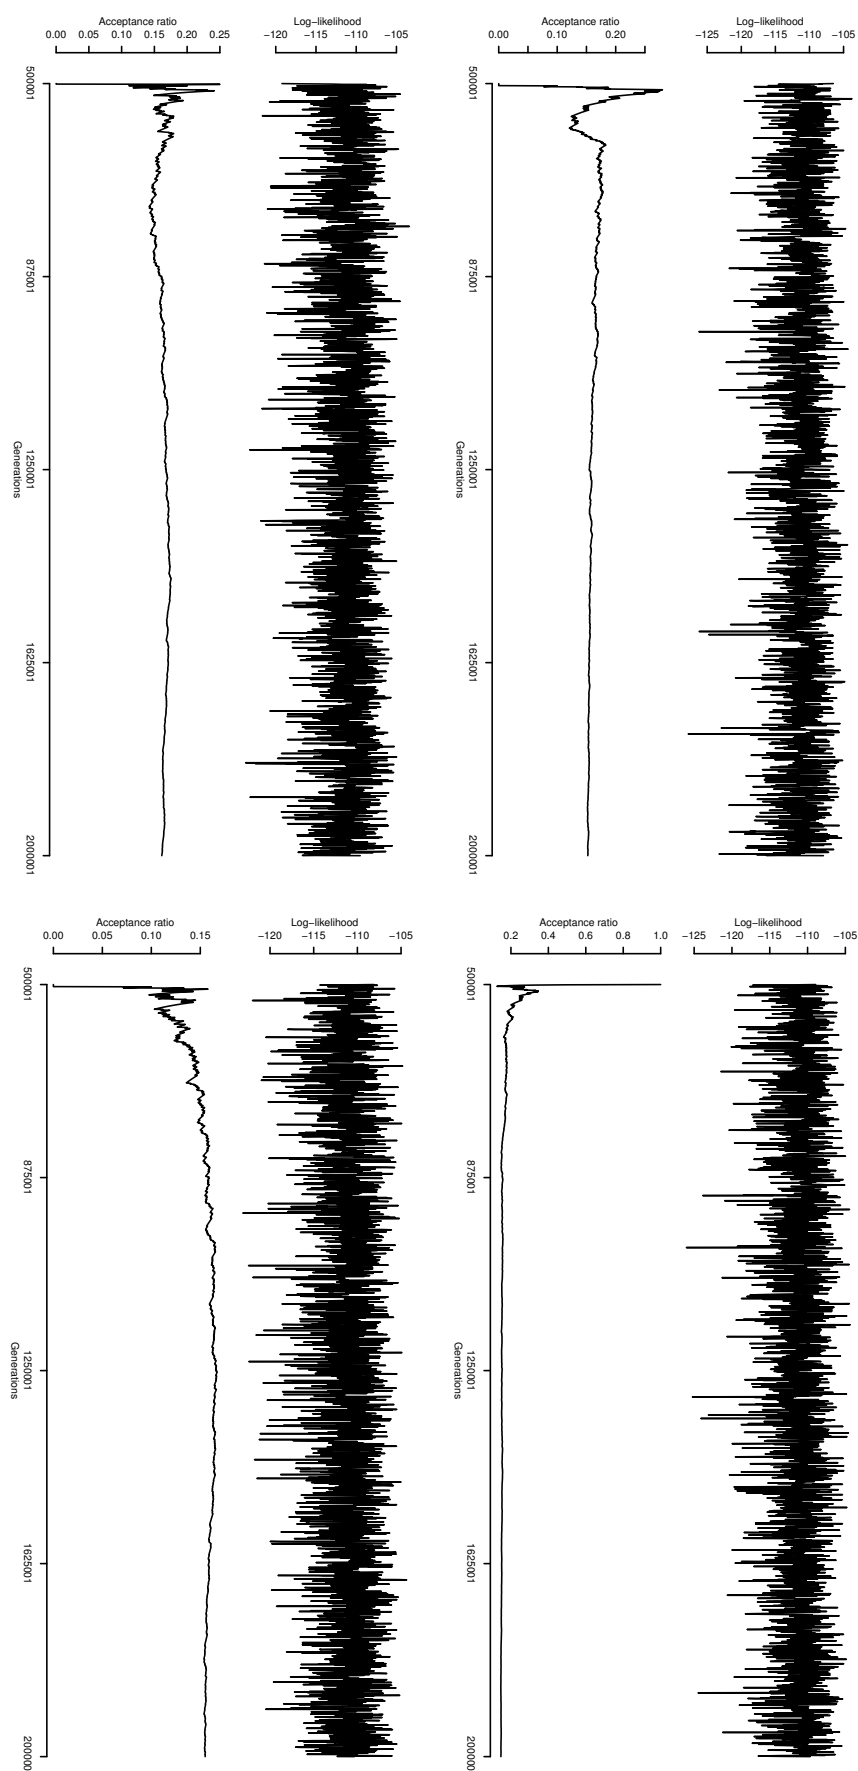

Figure S5: Trace plots of the log-likelihood and the acceptance ratio for the four independent MCMC chains of the island and mainland anole analysis.

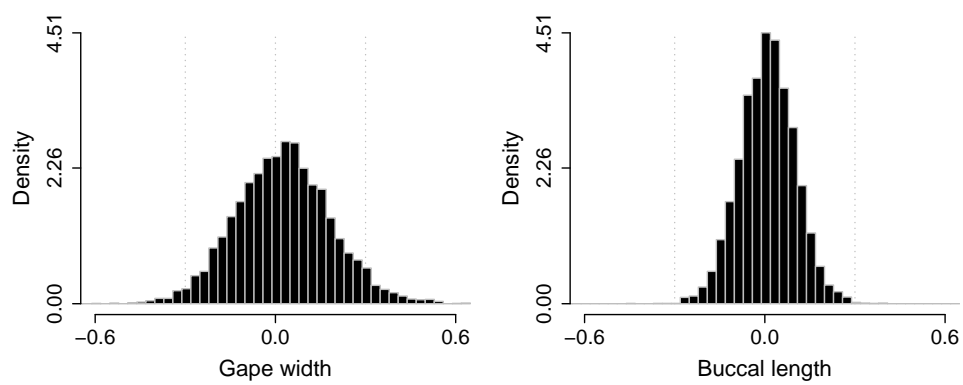

Figure S6: Posterior distribution of root values fitted to the Centrarchidae fishes.

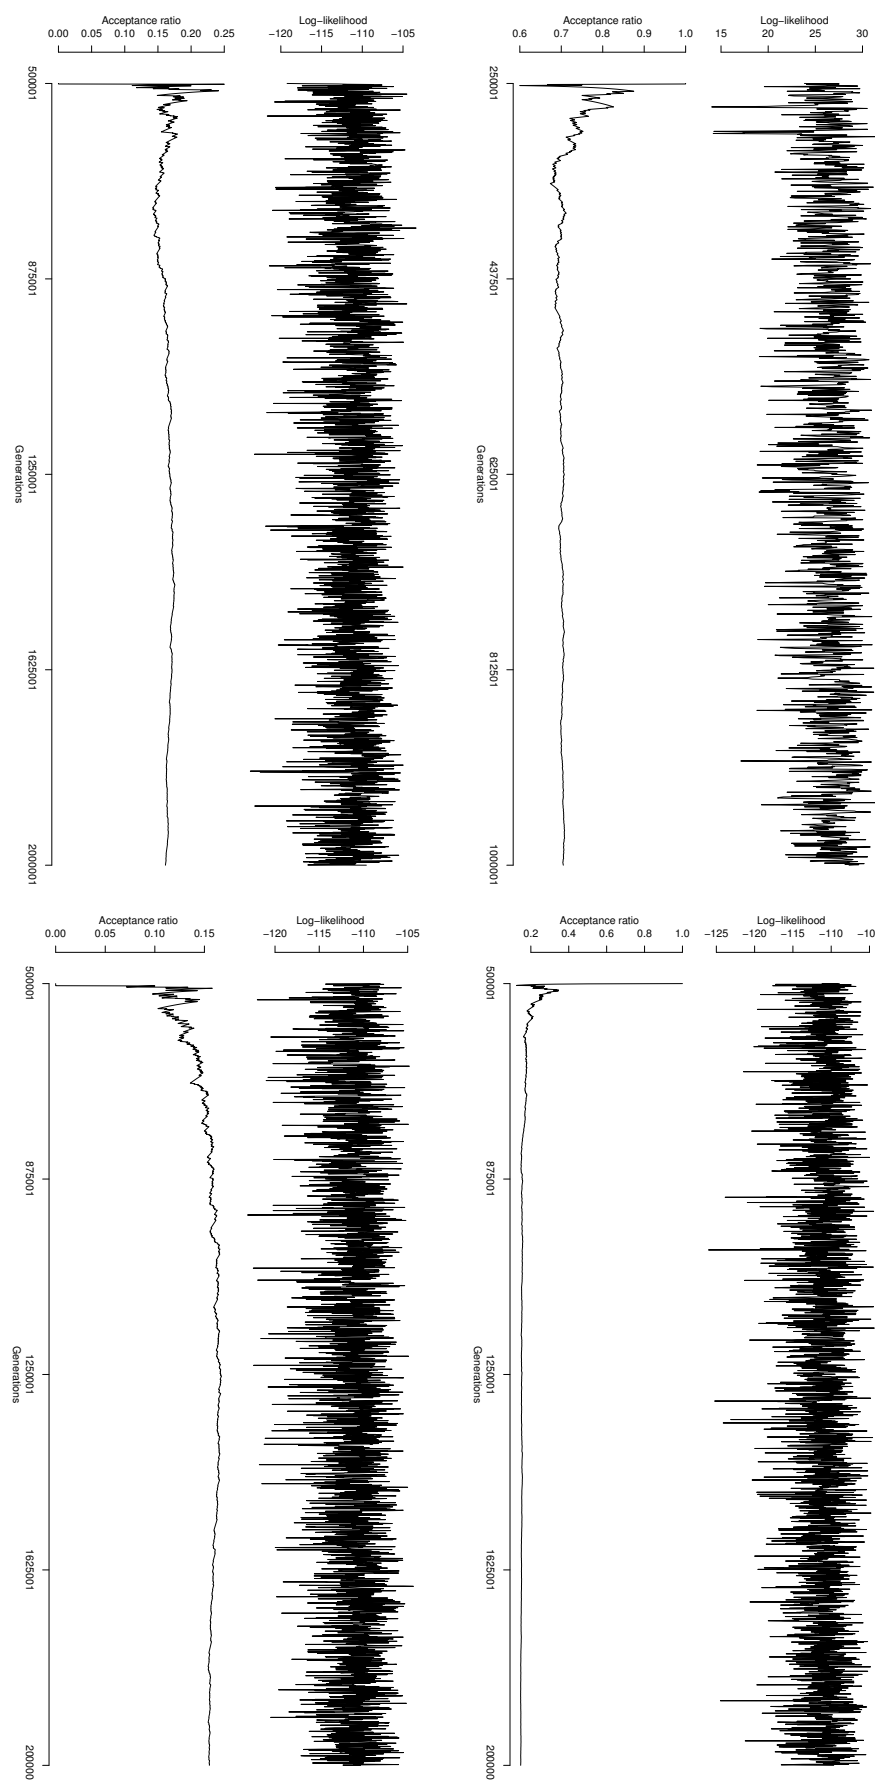

Figure S7: Trace plots of the log-likelihood and the acceptance ratio for the four independent MCMC chains of the Centrarchidae fishes analysis.

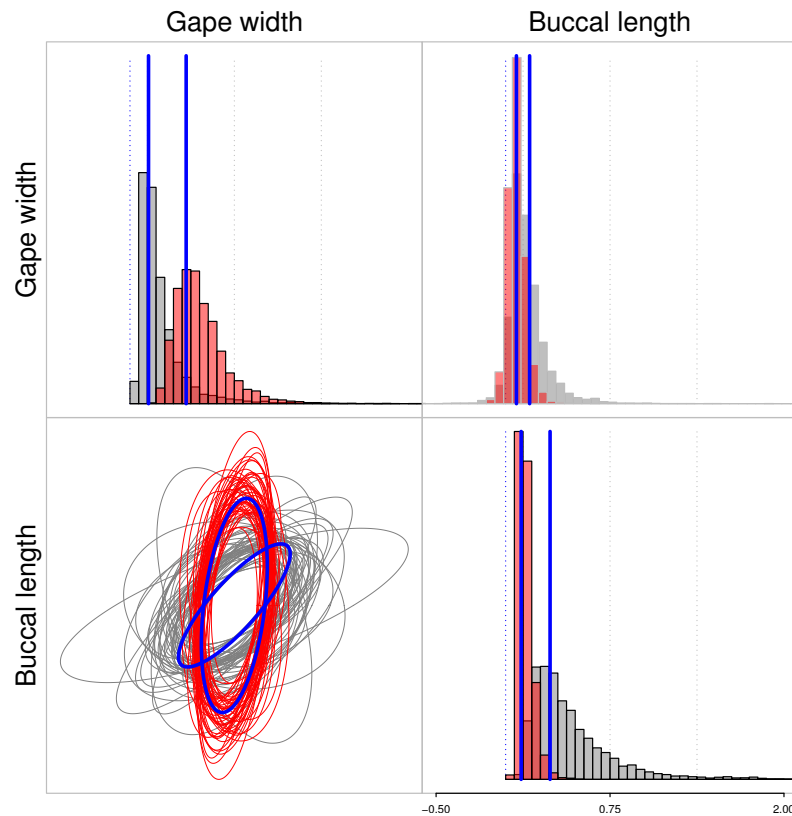

Figure S8: Posterior distribution of the  $\mathbf{R}$  matrix regimes fitted to the background group (gray) and to the *Micropterus* clade (red). Maximum likelihood estimate for the same data and phylogenetic tree showed in blue lines. Plot shows the posterior distribution of parameter estimates for the evolutionary rate matrices. Diagonal plots show evolutionary rates (variances) for each trait, upper-diagonal plot show pairwise evolutionary covariation (covariances), and lower-diagonal plot shows samples from the posterior distribution of ellipses showing the 95% confidence interval of each bivariate distribution.

Supplementary material for:

# Estimating correlated rates of trait evolution with uncertainty

CAETANO, D.S.<sup>1</sup> AND HARMON, L.J.<sup>1</sup>

<sup>1</sup>*Department of Biological Sciences, Institute for Bioinformatics and Evolutionary Studies (IBEST), University of Idaho, Moscow, Idaho, 83843, USA. E-mail: caetanods1@gmail.com*

---

## The pruning algorithm used to calculate the likelihood of multiple $\mathbf{R}$ matrices fitted to the tree

Here we describe in details the pruning algorithm (Felsenstein, 1973, 1985) applied to calculate the log-likelihood of a multivariate Brownian motion model in which the rates vary throughout the branches of the tree. The pruning algorithm explores the property that trait changes in each of the branches can be modelled independently and applies a multivariate normal density to compute the likelihood of evolutionary changes at each branch assuming a Brownian motion model (Felsenstein, 2004; Freckleton, 2012). When multiple rate regimes are fitted to a phylogeny, the likelihood is often computed by scaling the branch lengths by the rates (e.g., Eastman et al., 2011). However, this procedure is not applicable to the multivariate case, since the product of the length of a branch and the BM rate is a matrix. We derived the pruning algorithm for multiple rate regimes by following the same procedures described by Felsenstein (1973, 2004), but assuming that all rates are multivariate, that rates are different at each branch and that branches can have more than one rate regime (after Revell and Collar, 2009). This algorithm completely avoids the calculation of the matrix inverse and the determinant of the phylogenetic covariance matrix ( $\mathbf{C}$ ) or the Kronecker product between  $\mathbf{R}$  and  $\mathbf{C}$  matrices. However, the inverse of the  $\mathbf{R}$  matrix, which will have dimensions equal to the number of traits in the data set, is still required.

In this extension of the algorithm, each branch of the phylogeny can be assigned to one or more evolutionary rate matrix ( $\mathbf{R}$ ) regimes and the sum of the portions of the branch assigned to each regime need to be equal to the total length of that branch (Revell and Collar, 2009). We demonstrate that the algorithm yields the same likelihood as in Felsenstein (1973) and Freckleton (2012) by showing that all calculations converge when a single regime is fitted to tree. The pruning algorithm works by visiting the tips and going down node by node. At each step the contrast between two tips is computed and a new “phenotype” value replaces the two original tips, becoming the new tip. The likelihood of the contrast is calculated and we move to the next contrast until we reach the root node. From here on we will refer to the following phylogenetic tree as an example:

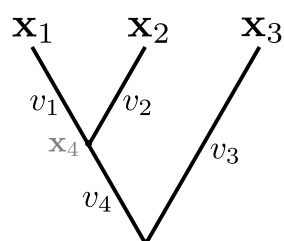

Where  $\mathbf{x}_i$  is a vector with  $r$  trait values for tip  $i$  and  $v_i$  is the branch length leading to tip or node  $i$ . We will refer to the node representing the common ancestor of tips 1 and 2 as the node 4 and the node representing the common ancestor of all tips as the root node. The method works as following:

1. **Calculate the contrast.** Choose a pair of tips  $i$  and  $j$  with a unique and exclusive common ancestor  $k$ . In our example, the selected species are 1 and 2. Compute the contrast  $\mathbf{u}_{ij} = \mathbf{x}_i - \mathbf{x}_j$ .

2. **Compute the log-likelihood.** Use the vector of contrasts ( $\mathbf{u}_{ij}$ ), the number of traits in the data ( $r$ ), the branch lengths ( $v_i$  and  $v_j$ ), and the length of the branches assigned to each of the  $k$  evolutionary rate matrix regimes (Revell and Collar, 2009) to compute the log-likelihood:

$$L = -\frac{1}{2} \left( r \log(2\pi) + \log |\mathbf{S}_i + \mathbf{S}_j| + \mathbf{u}_{ij}^T (\mathbf{S}_i + \mathbf{S}_j)^{-1} \mathbf{u}_{ij} \right)$$

where

$$\begin{aligned} \mathbf{S}_i &= \mathbf{R}_1 v_{1i} + \mathbf{R}_2 v_{2i} + \dots + \mathbf{R}_k v_{ki} \\ \mathbf{S}_j &= \mathbf{R}_1 v_{1j} + \mathbf{R}_2 v_{2j} + \dots + \mathbf{R}_k v_{kj} \end{aligned} \tag{1}$$

and

$$\begin{aligned} v_i &= v_{1i} + v_{2i} + \dots + v_{ki} \\ v_j &= v_{1j} + v_{2j} + \dots + v_{kj} \end{aligned}$$

If we assume a single evolutionary rate matrix is fitted to the whole tree, equation 1 reduces to equation 10 in Freckleton (2012):

Let

$$\mathbf{R} = \mathbf{R}_1 = \mathbf{R}_2 = \dots = \mathbf{R}_k$$

then

$$\begin{aligned} \mathbf{S}_i &= \mathbf{R}_1 v_{1i} + \mathbf{R}_2 v_{2i} + \dots + \mathbf{R}_k v_{ki} \\ &= \mathbf{R} v_{1i} + \mathbf{R} v_{2i} + \dots + \mathbf{R} v_{ki} \\ &= \mathbf{R} \sum_{l=1}^k v_{li} \end{aligned}$$

We know, from equation 1, that the sum of the portions of the branch length assigned to each regime is equal to the total length of the branch. Then:

$$\mathbf{S}_i = \mathbf{R}v_i \quad \text{as well as} \quad \mathbf{S}_j = \mathbf{R}v_j$$

and

$$\mathbf{S}_i + \mathbf{S}_j = \mathbf{R}(v_i + v_j)$$

Substituting into equation 1, we have:

$$\begin{aligned} L &= -\frac{1}{2} \left( r \log(2\pi) + \log |\mathbf{R}(v_i + v_j)| + \mathbf{u}_{ij}^T (\mathbf{R}(v_i + v_j))^{-1} \mathbf{u}_{ij} \right) \\ &= -\frac{1}{2} \left( r \log(2\pi) + \log |\mathbf{R}| + r \log(v_i + v_j) + \frac{\mathbf{u}_{ij}^T (\mathbf{R})^{-1} \mathbf{u}_{ij}}{(v_i + v_j)} \right) \end{aligned} \quad (2)$$

Which is the same as equation 10 in Freckleton (2012)<sup>1</sup>.

3. **Calculate the new phenotype vector  $\mathbf{x}_n$  for the node  $n$ .** This quantity is originally calculated as the weighted average of the vector of species means for species  $i$  and  $j$  with weights equal to the length of the branches  $v_i$  and  $v_j$ . For the case of a single trait,  $\mathbf{x}_{1i}$  and  $\mathbf{x}_{1j}$ , we would have:

$$\mathbf{x}_{1n} = \frac{v_i \sigma_{1i}^2}{v_i \sigma_{1i}^2 + v_j \sigma_{1j}^2} \mathbf{x}_{1j} + \frac{v_j \sigma_{1j}^2}{v_i \sigma_{1i}^2 + v_j \sigma_{1j}^2} \mathbf{x}_{1i} \quad (3)$$

When  $\sigma_i^2 = \sigma_j^2$ , equation 3 becomes equivalent to equation 7 in Felsenstein (1973) and the rates of each branch can be omitted. However, here we assume that rates are different in every branch, that the evolutionary covariance among traits are non-zero and that more than one rate regime can be assigned to the same branch. As a result, the rates need to be represented as variance-covariance matrices ( $\mathbf{R}_1, \mathbf{R}_2, \dots, \mathbf{R}_k$ ) and the sum of the product between the portions of each branch and their rate regimes is given by the matrices  $\mathbf{S}_i$  and  $\mathbf{S}_j$  (see equation 1). By expanding equation 3, we have:

$$\mathbf{x}_n = \mathbf{S}_i (\mathbf{S}_i + \mathbf{S}_j)^{-1} \mathbf{x}_j + \mathbf{S}_j (\mathbf{S}_i + \mathbf{S}_j)^{-1} \mathbf{x}_i \quad (4)$$

---

<sup>1</sup>Note that the published equation in Freckleton (2012) has a printing error. The corrected form is  $L = -\frac{1}{2} \left( k \log(2\pi) + \log |\mathbf{C}| + k \log V_i + \frac{\mathbf{u}_i^T \mathbf{C}^{-1} \mathbf{u}_i}{V_i} \right)$ . The correct form can be appreciated in the function ‘clik-General’ on line 393 of the Supporting Information file MEE3\_220-sm\_demo.R available online (Freckleton, 2012).

In the first step of our example, we calculate the phenotype value for the node 4 ( $\mathbf{x}_4$ ). Then, we prune the tips 1 and 2 from the tree, leaving only the tip 3 and the new tip 4 with vector of trait values  $\mathbf{x}_4$ . The next contrast will be calculated between  $\mathbf{x}_4$  and  $\mathbf{x}_3$ .

4. **Compute the variance of  $\mathbf{x}_n$ .** After computing the vector of trait values for the node  $n$ , we need to calculate the variance associated with the uncertainty in the estimation of  $\mathbf{x}_n$ . This uncertainty is added to the variance of the branch immediately below the node  $n$ . For a single trait and we would have:

$$var[\mathbf{x}_{1n}] = \frac{v_i \sigma_{1i}^2 v_j \sigma_{1j}^2}{v_i \sigma_{1i}^2 + v_j \sigma_{1j}^2} + v_n \sigma_{1n}^2 \quad (5)$$

Where  $m, \dots, n$  are the indexes for the branches that connect the root to the node  $n$  of the tree. Again, when a single rate regime is fitted to the tree, equation 5 is equivalent to equation 9 in Felsenstein (1973). For the multivariate case, this quantity becomes a variance-covariance matrix which is added to  $\mathbf{S}_n$  (the branch length below the node  $n$  multiplied by the rate regimes; see equation 2) and can be calculated as:

$$var[\mathbf{x}_n] = ((\mathbf{S}_i)^{-1} + (\mathbf{S}_j)^{-1})^{-1} + \mathbf{S}_n \quad (6)$$

The equivalence between equations 5 and 6 can be easily verified by checking the computation of the harmonic mean of matrices. For two scalar quantities the harmonic mean is given by  $\frac{2ab}{a+b}$  whereas for matrices we have  $((\mathbf{A})^{-1} + (\mathbf{B})^{-1})^{-1}$ .

5. **Repeat.** Steps 1 to 4 are repeated until only two tips remains. The root node will have a zero contrast. The variance associated with the root node is computed as:

$$var[\mathbf{root}] = ((\mathbf{S}_i)^{-1} + (\mathbf{S}_j)^{-1})^{-1} \quad (7)$$

6. **Compute the final log-likelihood.** The final log-likelihood conditioned on the phylogenetic tree, rate regime and trait data is computed as the sum of all partial (node-by-node) log-likelihoods computed in step 2.

## References

- Eastman, J. M., M. E. Alfaro, P. Joyce, A. L. Hipp, and L. J. Harmon. 2011. A novel comparative method for identifying shifts in the rate of character evolution on trees. *Evolution* 65:3578–3589.
- Felsenstein, J. 1973. Maximum-likelihood estimation of evolutionary trees from continuous characters. *Am. J. Hum. Genet.* 25:471–492.
- Felsenstein, J. 1985. Phylogenies and the comparative method. *Am. Nat.* 125:1–15.
- Felsenstein, J. 2004. Brownian motion and gene frequencies. chap. 23, Pages 391–414 *in* *Inferring Phylogenies*. Sinauer.
- Freckleton, R. P. 2012. Fast likelihood calculations for comparative analyses. *Method. Ecol. Evol.* 3:940–947.
- Revell, L. J. and D. C. Collar. 2009. Phylogenetic analysis of the evolutionary correlation using likelihood. *Evolution* 63:1090–1100.
